# Supplementary material for: Differential Transcription and Alternative Splicing in Cotton Underly Specialized Defense Responses Against Pests
Source: Front Plant Sci. 2020 Sep 15;11:573131. doi: 10.3389/fpls.2020.573131 (PMC7533563; doi:10.3389/fpls.2020.573131)
Supplement: Supplementary file 3 [file DataSheet_3.xlsx]

## Sheet: reduced genes only in HA
Class	GO_Name	GO_ID	GO_Level	P_value	EnrichmentScore	HitsGenesCountsInSelectedSet	HitsGenesCountsInBackground	AllGenesCountsInSelectedSet	AllGenesCountsInBackground	GenesOfSelectedSetInGOterm	corrected p-value(BH method)
Biological process	establishment of protein localization to chloroplast	GO:0072596	8	6.69424e-09	15.3955	9	56	472	45215	Gh_A04G0502,Gh_D07G0477,Gh_A12G0357,Gh_D07G0985,Gh_D11G1077,Gh_D03G1045,Gh_A13G0085,Gh_A07G0412,Gh_A03G0491,	7.77871e-06
Biological process	protein localization to chloroplast	GO:0072598	7	6.69424e-09	15.3955	9	56	472	45215	Gh_A04G0502,Gh_D07G0477,Gh_A12G0357,Gh_D07G0985,Gh_D11G1077,Gh_D03G1045,Gh_A13G0085,Gh_A07G0412,Gh_A03G0491,	7.77871e-06
Biological process	protein targeting to chloroplast	GO:0045036	11	6.69424e-09	15.3955	9	56	472	45215	Gh_A04G0502,Gh_D07G0477,Gh_A12G0357,Gh_D07G0985,Gh_D11G1077,Gh_D03G1045,Gh_A13G0085,Gh_A07G0412,Gh_A03G0491,	7.77871e-06
Biological process	plastid organization	GO:0009657	5	4.10497e-07	5.42965	14	247	472	45215	Gh_D07G0477,Gh_A08G0617,Gh_D08G2403,Gh_D06G1168,Gh_D07G0985,Gh_D13G1431,Gh_D05G1796,Gh_D03G1045,Gh_A08G2010,Gh_A01G0163,Gh_A07G0412,Gh_A11G1373,Gh_D08G0711,Gh_A03G0491,	0.000119249
Biological process	tetrapyrrole biosynthetic process	GO:0033014	6	1.16808e-06	6.54497	11	161	472	45215	Gh_A09G2069,Gh_D07G0477,Gh_A11G0957,Gh_A11G1434,Gh_D11G2361,Gh_A02G0754,Gh_D03G1045,Gh_D05G2235,Gh_D05G2237,Gh_A07G0412,Gh_A03G0491,	0.000271461
Biological process	tetrapyrrole metabolic process	GO:0033013	5	1.8682e-06	5.63497	12	204	472	45215	Gh_A09G2069,Gh_D07G0477,Gh_A11G0957,Gh_A11G1434,Gh_D11G2361,Gh_A02G0754,Gh_D03G1045,Gh_D05G2235,Gh_A07G1520,Gh_D05G2237,Gh_A07G0412,Gh_A03G0491,	0.000361808
Biological process	amino acid activation	GO:0043038	8	2.24372e-06	6.89169	10	139	472	45215	Gh_D08G0179,Gh_A08G0127,Gh_A08G0252,Gh_D07G1680,Gh_A12G2307,Gh_D08G2534,Gh_A10G2190,Gh_D09G1864,Gh_D01G1770,Gh_A07G1530,	0.000372457
Biological process	tRNA aminoacylation	GO:0043039	10	2.24372e-06	6.89169	10	139	472	45215	Gh_D08G0179,Gh_A08G0127,Gh_A08G0252,Gh_D07G1680,Gh_A12G2307,Gh_D08G2534,Gh_A10G2190,Gh_D09G1864,Gh_D01G1770,Gh_A07G1530,	0.000372457
Biological process	tRNA aminoacylation for protein translation	GO:0006418	11	2.24372e-06	6.89169	10	139	472	45215	Gh_D08G0179,Gh_A08G0127,Gh_A08G0252,Gh_D07G1680,Gh_A12G2307,Gh_D08G2534,Gh_A10G2190,Gh_D09G1864,Gh_D01G1770,Gh_A07G1530,	0.000372457
Biological process	porphyrin-containing compound biosynthetic process	GO:0006779	7	3.28457e-06	6.60652	10	145	472	45215	Gh_A09G2069,Gh_D07G0477,Gh_A11G0957,Gh_D11G2361,Gh_A02G0754,Gh_D03G1045,Gh_D05G2235,Gh_D05G2237,Gh_A07G0412,Gh_A03G0491,	0.000381667
Biological process	cofactor metabolic process	GO:0051186	4	3.61664e-06	3.01405	23	731	472	45215	Gh_A02G1086,Gh_D04G0140,Gh_D08G1043,Gh_D03G0624,Gh_A09G2069,Gh_D07G0477,Gh_D11G1529,Gh_D04G1062,Gh_D13G1361,Gh_A11G0957,Gh_D06G1283,Gh_D11G2361,Gh_A02G0754,Gh_D05G2534,Gh_D03G1045,Gh_A11G1167,Gh_D05G2235,Gh_A07G1520,Gh_D05G2237,Gh_A06G1049,Gh_A07G0412,Gh_A03G0491,Gh_A11G1385,	0.000382049
Biological process	ncRNA metabolic process	GO:0034660	8	6.57738e-06	4.02498	15	357	472	45215	Gh_D12G1440,Gh_D08G0179,Gh_A09G0051,Gh_A09G2235,Gh_A08G0127,Gh_A08G0252,Gh_D07G1680,Gh_A12G2307,Gh_D08G2534,Gh_A10G2190,Gh_D05G2444,Gh_D09G1864,Gh_D01G1770,Gh_A07G1530,Gh_D09G0046,	0.00063691
Biological process	porphyrin-containing compound metabolic process	GO:0006778	6	7.45187e-06	5.40379	11	195	472	45215	Gh_A09G2069,Gh_D07G0477,Gh_A11G0957,Gh_D11G2361,Gh_A02G0754,Gh_D03G1045,Gh_D05G2235,Gh_A07G1520,Gh_D05G2237,Gh_A07G0412,Gh_A03G0491,	0.000666083
Biological process	pigment metabolic process	GO:0042440	3	7.59126e-06	4.23067	14	317	472	45215	Gh_A11G3067,Gh_A09G2069,Gh_D07G0477,Gh_A05G2282,Gh_A01G1600,Gh_D11G2361,Gh_A02G0754,Gh_D05G2543,Gh_D03G1045,Gh_A03G1763,Gh_D05G2235,Gh_A07G1520,Gh_A07G0412,Gh_A03G0491,	0.000630075
Biological process	regulation of tetrapyrrole metabolic process	GO:1901401	6	1.0613e-05	11.9743	6	48	472	45215	Gh_A09G2069,Gh_D07G0477,Gh_D03G1045,Gh_A07G1520,Gh_A07G0412,Gh_A03G0491,	0.000822157
Biological process	regulation of chlorophyll metabolic process	GO:0090056	7	1.0613e-05	11.9743	6	48	472	45215	Gh_A09G2069,Gh_D07G0477,Gh_D03G1045,Gh_A07G1520,Gh_A07G0412,Gh_A03G0491,	0.000822157
Biological process	cellular aldehyde metabolic process	GO:0006081	4	1.15012e-05	7.58768	8	101	472	45215	Gh_D11G1529,Gh_D02G2425,Gh_D11G2361,Gh_A11G0011,Gh_D05G2534,Gh_A06G1049,Gh_A03G1580,Gh_A11G1385,	0.000786142
Biological process	glyceraldehyde-3-phosphate metabolic process	GO:0019682	6	1.16246e-05	9.18577	7	73	472	45215	Gh_D11G1529,Gh_D02G2425,Gh_D11G2361,Gh_A11G0011,Gh_A06G1049,Gh_A03G1580,Gh_A11G1385,	0.000750431
Biological process	tRNA metabolic process	GO:0006399	9	1.1641e-05	4.7112	12	244	472	45215	Gh_D08G0179,Gh_A09G0051,Gh_A08G0127,Gh_A08G0252,Gh_D07G1680,Gh_A12G2307,Gh_D08G2534,Gh_A10G2190,Gh_D09G1864,Gh_D01G1770,Gh_A07G1530,Gh_D09G0046,	0.000711939
Biological process	carotene metabolic process	GO:0016119	8	2.63076e-05	14.0874	5	34	472	45215	Gh_A05G0375,Gh_D11G2616,Gh_A08G0500,Gh_D11G2361,Gh_D13G1826,	0.00145569
Biological process	chlorophyll biosynthetic process	GO:0015995	8	2.96475e-05	6.66396	8	115	472	45215	Gh_A09G2069,Gh_D07G0477,Gh_D11G2361,Gh_A02G0754,Gh_D03G1045,Gh_D05G2235,Gh_A07G0412,Gh_A03G0491,	0.00156593
Biological process	embryo development ending in seed dormancy	GO:0009793	6	3.68426e-05	2.42991	26	1025	472	45215	Gh_D12G0236,Gh_A05G2798,Gh_D12G1413,Gh_D07G0540,Gh_A08G0252,Gh_A03G0861,Gh_D05G3190,Gh_D05G3197,Gh_D05G3097,Gh_D07G1680,Gh_D11G2525,Gh_A08G1842,Gh_D06G1086,Gh_D08G2534,Gh_A10G2190,Gh_A12G2418,Gh_D08G2200,Gh_D13G1311,Gh_D11G0042,Gh_A04G0116,Gh_A02G1797,Gh_D10G2427,Gh_A13G1049,Gh_A07G1530,Gh_D10G2321,Gh_D06G1504,	0.00186135
Biological process	regulation of chlorophyll biosynthetic process	GO:0010380	8	4.58544e-05	12.6045	5	38	472	45215	Gh_A09G2069,Gh_D07G0477,Gh_D03G1045,Gh_A07G0412,Gh_A03G0491,	0.00222012
Biological process	regulation of tetrapyrrole biosynthetic process	GO:1901463	7	4.58544e-05	12.6045	5	38	472	45215	Gh_A09G2069,Gh_D07G0477,Gh_D03G1045,Gh_A07G0412,Gh_A03G0491,	0.00222012
Biological process	chlorophyll metabolic process	GO:0015994	7	4.6419e-05	5.45665	9	158	472	45215	Gh_A09G2069,Gh_D07G0477,Gh_D11G2361,Gh_A02G0754,Gh_D03G1045,Gh_D05G2235,Gh_A07G1520,Gh_A07G0412,Gh_A03G0491,	0.00207457
Biological process	regulation of cofactor metabolic process	GO:0051193	6	5.6328e-05	8.98073	6	64	472	45215	Gh_A09G2069,Gh_D07G0477,Gh_D03G1045,Gh_A07G1520,Gh_A07G0412,Gh_A03G0491,	0.00242419
Biological process	protein import	GO:0017038	9	7.39418e-05	6.913	7	97	472	45215	Gh_D03G1749,Gh_A04G0502,Gh_D07G0477,Gh_D03G1045,Gh_A07G0412,Gh_D12G1210,Gh_A03G0491,	0.00296277
Biological process	protein targeting	GO:0006605	10	7.87375e-05	4.18151	11	252	472	45215	Gh_D03G1749,Gh_A04G0502,Gh_D07G0477,Gh_A12G0357,Gh_D07G0985,Gh_D11G1077,Gh_D03G1045,Gh_A13G0085,Gh_A07G0412,Gh_D12G1210,Gh_A03G0491,	0.00304977
Biological process	terpene metabolic process	GO:0042214	7	8.42473e-05	11.1389	5	43	472	45215	Gh_A05G0375,Gh_D11G2616,Gh_A08G0500,Gh_D11G2361,Gh_D13G1826,	0.00315791
Biological process	seed development	GO:0048316	5	0.000109929	2.2297	27	1160	472	45215	Gh_D12G0236,Gh_A05G2798,Gh_D12G1413,Gh_D07G0540,Gh_A08G0252,Gh_A03G0861,Gh_D05G3190,Gh_D05G3197,Gh_D05G3097,Gh_D07G1680,Gh_D11G2525,Gh_A08G1842,Gh_D06G1086,Gh_A12G2307,Gh_D08G2534,Gh_A10G2190,Gh_A12G2418,Gh_D08G2200,Gh_D13G1311,Gh_D11G0042,Gh_A04G0116,Gh_A02G1797,Gh_D10G2427,Gh_A13G1049,Gh_A07G1530,Gh_D10G2321,Gh_D06G1504,	0.0033615
Biological process	response to far red light	GO:0010218	7	0.000129446	6.32605	7	106	472	45215	Gh_A07G0717,Gh_D07G0779,Gh_D13G1006,Gh_D13G1851,Gh_A12G2280,Gh_A13G2269,Gh_A11G2372,	0.0037604
Biological process	metabolic process	GO:0008152	2	0.000135311	1.20778	229	18163	472	45215	Gh_D05G3270,Gh_D12G1440,Gh_A09G2014,Gh_A12G0747,Gh_D04G0146,Gh_D05G3040,Gh_A11G3067,Gh_A02G1086,Gh_D08G0179,Gh_A06G1093,Gh_A08G1562,Gh_A12G1947,Gh_A05G0264,Gh_A05G0375,Gh_A05G2798,Gh_A12G1614,Gh_A09G0051,Gh_A09G2235,Gh_D07G1755,Gh_D01G1175,Gh_D12G1413,Gh_D04G0140,Gh_D08G1043,Gh_A08G0127,Gh_A03G0978,Gh_A05G3876,Gh_A07G0717,Gh_A08G0252,Gh_A05G2549,Gh_A04G0311,Gh_D07G0779,Gh_A03G1711,Gh_A03G0861,Gh_…	0.0038349
Biological process	cofactor biosynthetic process	GO:0051188	5	0.000155299	2.91945	16	525	472	45215	Gh_A02G1086,Gh_D04G0140,Gh_D08G1043,Gh_A09G2069,Gh_D07G0477,Gh_D04G1062,Gh_D13G1361,Gh_A11G0957,Gh_D11G2361,Gh_A02G0754,Gh_D05G2534,Gh_D03G1045,Gh_D05G2235,Gh_D05G2237,Gh_A07G0412,Gh_A03G0491,	0.00429662
Biological process	protein localization to organelle	GO:0033365	6	0.00023055	3.69733	11	285	472	45215	Gh_D13G1006,Gh_A04G0502,Gh_D07G0477,Gh_A12G0357,Gh_D07G0985,Gh_D11G1077,Gh_D03G1045,Gh_A13G2269,Gh_A13G0085,Gh_A07G0412,Gh_A03G0491,	0.00623021
Biological process	fruit development	GO:0010154	5	0.000258299	2.11311	27	1224	472	45215	Gh_D12G0236,Gh_A05G2798,Gh_D12G1413,Gh_D07G0540,Gh_A08G0252,Gh_A03G0861,Gh_D05G3190,Gh_D05G3197,Gh_D05G3097,Gh_D07G1680,Gh_D11G2525,Gh_A08G1842,Gh_D06G1086,Gh_A12G2307,Gh_D08G2534,Gh_A10G2190,Gh_A12G2418,Gh_D08G2200,Gh_D13G1311,Gh_D11G0042,Gh_A04G0116,Gh_A02G1797,Gh_D10G2427,Gh_A13G1049,Gh_A07G1530,Gh_D10G2321,Gh_D06G1504,	0.00682144
Biological process	post-embryonic development	GO:0009791	3	0.000260721	1.69924	48	2706	472	45215	Gh_A11G3067,Gh_D08G0179,Gh_D12G0236,Gh_A05G0264,Gh_A05G2798,Gh_D12G1413,Gh_D07G0540,Gh_A08G0127,Gh_A07G0717,Gh_A08G0252,Gh_A05G2549,Gh_D07G0779,Gh_A03G0861,Gh_D05G3190,Gh_D05G3197,Gh_D13G1006,Gh_D13G0171,Gh_D05G3097,Gh_D07G1680,Gh_D11G2525,Gh_A08G0617,Gh_A05G2282,Gh_A08G1842,Gh_D06G1086,Gh_A12G2307,Gh_D08G2534,Gh_A10G2190,Gh_A12G2418,Gh_D08G2200,Gh_D05G2938,Gh_D11G1228,Gh_D13G1311,Gh_D11G0042,Gh_…	0.00658605
Biological process	chloroplast organization	GO:0009658	6	0.000285288	4.81985	8	159	472	45215	Gh_D07G0477,Gh_D07G0985,Gh_D13G1431,Gh_D05G1796,Gh_D03G1045,Gh_A07G0412,Gh_A11G1373,Gh_A03G0491,	0.0070533
Biological process	protein transmembrane transport	GO:0071806	9	0.000413336	7.98287	5	60	472	45215	Gh_A04G0502,Gh_D07G0477,Gh_D03G1045,Gh_A07G0412,Gh_A03G0491,	0.00960592
Biological process	intracellular protein transmembrane transport	GO:0065002	10	0.000413336	7.98287	5	60	472	45215	Gh_A04G0502,Gh_D07G0477,Gh_D03G1045,Gh_A07G0412,Gh_A03G0491,	0.00960592
Biological process	photosynthesis, light reaction	GO:0019684	5	0.000446453	4.50798	8	170	472	45215	Gh_A02G0024,Gh_A12G0060,Gh_D08G0636,Gh_A11G1053,Gh_D12G1145,Gh_A01G0163,Gh_D02G0038,Gh_D11G0710,	0.00997651

## Sheet: reduced genes only in AL
Class	GO_Name	GO_ID	GO_Level	P_value	EnrichmentScore	HitsGenesCountsInSelectedSet	HitsGenesCountsInBackground	AllGenesCountsInSelectedSet	AllGenesCountsInBackground	GenesOfSelectedSetInGOterm	corrected p-value(BH method)
Biological process	photosynthesis	GO:0015979	4	0	6.11725	33	289	844	45215	Gh_Sca005798G01,Gh_A12G1617,Gh_A13G0316,Gh_A07G2184,Gh_D11G1146,Gh_D05G3725,Gh_A03G1038,Gh_D10G0369,Gh_A07G0594,Gh_A11G2259,Gh_D07G0391,Gh_A05G0654,Gh_D04G1626,Gh_D10G2385,Gh_D08G0702,Gh_A13G0222,Gh_A03G1927,Gh_D06G0944,Gh_A10G0391,Gh_D12G1757,Gh_A10G0361,Gh_D13G0236,Gh_A12G1130,Gh_A04G0007,Gh_D05G0799,Gh_D06G2350,Gh_A12G0092,Gh_D08G1772,Gh_D05G1244,Gh_A05G0725,Gh_D04G1512,Gh_D02G2366,Gh_A05G3843,	0
Biological process	photosynthesis, light reaction	GO:0019684	5	2.4623e-08	5.35723	17	170	844	45215	Gh_Sca005798G01,Gh_A13G0316,Gh_D05G3725,Gh_A03G1038,Gh_D10G0369,Gh_D07G0391,Gh_A05G0654,Gh_A13G0222,Gh_A10G0391,Gh_A10G0361,Gh_D13G0236,Gh_A04G0007,Gh_D05G0799,Gh_A12G0092,Gh_D08G1772,Gh_A05G0725,Gh_D04G1512,	1.65713e-05
Biological process	response to abiotic stimulus	GO:0009628	3	3.47302e-08	1.70543	109	3424	844	45215	Gh_D06G1704,Gh_D12G0111,Gh_A09G2473,Gh_A10G0043,Gh_A08G1344,Gh_A09G0062,Gh_D01G0090,Gh_A13G0316,Gh_A08G1503,Gh_D09G0097,Gh_A08G0683,Gh_D11G2971,Gh_A10G1331,Gh_A05G3679,Gh_D13G1445,Gh_A02G0495,Gh_A12G0349,Gh_A09G1568,Gh_A05G1083,Gh_A12G1661,Gh_D13G0136,Gh_A07G2184,Gh_D01G1336,Gh_A11G2719,Gh_A12G0111,Gh_A03G2085,Gh_D08G1592,Gh_D08G1359,Gh_D07G0644,Gh_A06G0873,Gh_D06G2168,Gh_D03G1443,Gh_D08G2694,Gh_…	1.55823e-05
Biological process	photosynthesis, light harvesting	GO:0009765	5	5.41235e-08	11.7598	9	41	844	45215	Gh_D10G0369,Gh_A05G0654,Gh_A13G0222,Gh_A10G0391,Gh_A10G0361,Gh_D13G0236,Gh_D05G0799,Gh_D08G1772,Gh_A05G0725,	1.82126e-05
Biological process	photosynthesis, light harvesting in photosystem I	GO:0009768	6	1.15017e-05	15.7566	5	17	844	45215	Gh_A05G0654,Gh_A13G0222,Gh_D13G0236,Gh_D05G0799,Gh_A05G0725,	0.00309625
Biological process	response to light stimulus	GO:0009416	5	1.58988e-05	1.92331	48	1337	844	45215	Gh_D12G0111,Gh_A09G2473,Gh_A08G1344,Gh_A09G0062,Gh_D01G0090,Gh_A13G0316,Gh_A08G0683,Gh_D11G2971,Gh_A12G0349,Gh_A07G2184,Gh_A12G0111,Gh_D08G1592,Gh_D08G1359,Gh_D01G1860,Gh_D11G1146,Gh_D05G1777,Gh_D09G1525,Gh_A02G1305,Gh_D04G0993,Gh_D08G0797,Gh_A05G1998,Gh_A05G0410,Gh_A11G3124,Gh_A11G2688,Gh_D10G2385,Gh_A13G0222,Gh_D03G0445,Gh_A12G1960,Gh_D03G0408,Gh_A09G1066,Gh_D13G0236,Gh_A02G1268,Gh_D11G3525,Gh_…	0.00356664
Biological process	response to radiation	GO:0009314	4	2.87457e-05	1.87836	48	1369	844	45215	Gh_D12G0111,Gh_A09G2473,Gh_A08G1344,Gh_A09G0062,Gh_D01G0090,Gh_A13G0316,Gh_A08G0683,Gh_D11G2971,Gh_A12G0349,Gh_A07G2184,Gh_A12G0111,Gh_D08G1592,Gh_D08G1359,Gh_D01G1860,Gh_D11G1146,Gh_D05G1777,Gh_D09G1525,Gh_A02G1305,Gh_D04G0993,Gh_D08G0797,Gh_A05G1998,Gh_A05G0410,Gh_A11G3124,Gh_A11G2688,Gh_D10G2385,Gh_A13G0222,Gh_D03G0445,Gh_A12G1960,Gh_D03G0408,Gh_A09G1066,Gh_D13G0236,Gh_A02G1268,Gh_D11G3525,Gh_…	0.00552739
Biological process	microtubule-based process	GO:0007017	3	3.53946e-05	3.16225	17	288	844	45215	Gh_A01G0658,Gh_A10G2259,Gh_D03G1454,Gh_D05G0897,Gh_D02G2420,Gh_D10G0789,Gh_D09G0419,Gh_A05G0850,Gh_A03G0127,Gh_A09G2160,Gh_D03G1145,Gh_D08G1960,Gh_D10G0664,Gh_A11G2742,Gh_D09G2365,Gh_A05G0766,Gh_A03G1585,	0.00595514
Biological process	plant-type primary cell wall biogenesis	GO:0009833	6	3.55501e-05	12.7553	5	21	844	45215	Gh_A05G3694,Gh_A05G3959,Gh_D08G0584,Gh_D05G2313,Gh_A11G3209,	0.00531671
Biological process	generation of precursor metabolites and energy	GO:0006091	4	7.57853e-05	2.61025	21	431	844	45215	Gh_Sca005798G01,Gh_A13G0316,Gh_D05G3725,Gh_A03G1038,Gh_D10G0369,Gh_D07G0391,Gh_A05G0654,Gh_D06G1991,Gh_A13G0222,Gh_A10G0391,Gh_A10G0361,Gh_D13G0236,Gh_A04G0007,Gh_A06G1622,Gh_A01G1605,Gh_D05G0799,Gh_A12G0092,Gh_D08G1772,Gh_A11G0330,Gh_A05G0725,Gh_D04G1512,	0.00927336

## Sheet: reduced genes both in AL and HA
Class	GO_Name	GO_ID	GO_Level	P_value	EnrichmentScore	HitsGenesCountsInSelectedSet	HitsGenesCountsInBackground	AllGenesCountsInSelectedSet	AllGenesCountsInBackground	GenesOfSelectedSetInGOterm	corrected p-value(BH method)
Biological process	tetrapyrrole metabolic process	GO:0033013	5	0	6.15256	41	204	1477	45215	Gh_A08G0463,Gh_D04G1284,Gh_A11G2056,Gh_A05G3249,Gh_A10G2274,Gh_D06G2150,Gh_A10G2292,Gh_D09G1997,Gh_D08G0549,Gh_A03G0591,Gh_A08G2520,Gh_A01G0139,Gh_A05G3766,Gh_A10G1223,Gh_D03G0876,Gh_A06G1826,Gh_D01G0183,Gh_D11G1105,Gh_D05G3825,Gh_D02G0797,Gh_A10G0282,Gh_D07G0488,Gh_D07G0474,Gh_A06G1917,Gh_A09G2286,Gh_D10G1660,Gh_D10G1640,Gh_D10G1271,Gh_A04G0903,Gh_D04G1452,Gh_D04G1415,Gh_D04G1379,Gh_A10G2305,Gh_…	0
Biological process	electron transport chain	GO:0022900	5	0	7.6004	36	145	1477	45215	Gh_D09G2090,Gh_A05G1017,Gh_D13G0354,Gh_D05G1135,Gh_A10G1862,Gh_D05G1179,Gh_A03G0593,Gh_A12G1903,Gh_A03G1706,Gh_A03G1705,Gh_Sca035444G01,Gh_D03G0881,Gh_D13G1343,Gh_A06G1303,Gh_D11G1066,Gh_A09G1890,Gh_D02G2126,Gh_D02G2127,Gh_A05G3863,Gh_A11G2345,Gh_A11G3190,Gh_A11G0924,Gh_A01G0275,Gh_D01G0287,Gh_D12G2083,Gh_D11G2278,Gh_A13G1078,Gh_D11G0911,Gh_A08G1594,Gh_D10G2127,Gh_A11G1738,Gh_D11G2659,Gh_A11G0782…	0
Biological process	porphyrin-containing compound metabolic process	GO:0006778	6	0	6.12255	39	195	1477	45215	Gh_D04G1284,Gh_A11G2056,Gh_A05G3249,Gh_A10G2274,Gh_D06G2150,Gh_A10G2292,Gh_D09G1997,Gh_A03G0591,Gh_A08G2520,Gh_A01G0139,Gh_A05G3766,Gh_A10G1223,Gh_D03G0876,Gh_A06G1826,Gh_D01G0183,Gh_D11G1105,Gh_D05G3825,Gh_D02G0797,Gh_A10G0282,Gh_D07G0488,Gh_D07G0474,Gh_A06G1917,Gh_A09G2286,Gh_D10G1660,Gh_D10G1640,Gh_D10G1271,Gh_A04G0903,Gh_D04G1452,Gh_D04G1415,Gh_D04G1379,Gh_A10G2305,Gh_A05G2230,Gh_A04G0879,Gh_…	0
Biological process	porphyrin-containing compound biosynthetic process	GO:0006779	7	0	7.38928	35	145	1477	45215	Gh_D04G1284,Gh_A11G2056,Gh_A05G3249,Gh_A10G2274,Gh_D06G2150,Gh_A10G2292,Gh_D09G1997,Gh_A03G0591,Gh_A08G2520,Gh_A01G0139,Gh_A05G3766,Gh_A10G1223,Gh_D03G0876,Gh_A06G1826,Gh_D01G0183,Gh_D11G1105,Gh_D05G3825,Gh_D02G0797,Gh_A10G0282,Gh_D07G0488,Gh_D07G0474,Gh_A09G2286,Gh_D10G1660,Gh_D10G1640,Gh_D10G1271,Gh_A04G0903,Gh_D04G1452,Gh_D04G1415,Gh_D04G1379,Gh_A04G0879,Gh_D08G2756,Gh_D13G1533,Gh_D10G0283,Gh_…	0
Biological process	response to light stimulus	GO:0009416	5	0	2.63311	115	1337	1477	45215	Gh_A13G1665,Gh_D10G2299,Gh_D04G1229,Gh_A03G1831,Gh_A04G0748,Gh_D02G2060,Gh_A11G2068,Gh_A08G1300,Gh_D11G1671,Gh_D13G0354,Gh_D05G0606,Gh_A01G0439,Gh_D07G1964,Gh_D07G0636,Gh_D08G1373,Gh_A03G0935,Gh_D01G2232,Gh_A07G2366,Gh_A09G1935,Gh_A11G1510,Gh_D01G1889,Gh_D06G1799,Gh_D02G1996,Gh_A07G0114,Gh_A05G1529,Gh_D09G2008,Gh_A04G0721,Gh_D12G2691,Gh_D05G1179,Gh_A05G1564,Gh_A05G3730,Gh_D01G1810,Gh_D07G1663,Gh_…	0
Biological process	photosynthesis, light reaction	GO:0019684	5	0	11.5248	64	170	1477	45215	Gh_A13G1201,Gh_D12G0105,Gh_A01G1349,Gh_A10G1346,Gh_A11G2068,Gh_D13G1272,Gh_A05G1017,Gh_D13G0354,Gh_D11G1208,Gh_A05G3293,Gh_A01G1717,Gh_D07G1090,Gh_D05G1135,Gh_D04G0311,Gh_A10G1862,Gh_D05G1179,Gh_A03G0593,Gh_A05G0229,Gh_A03G1706,Gh_A03G1705,Gh_Sca035444G01,Gh_D07G1624,Gh_D03G0881,Gh_D13G1343,Gh_D01G1028,Gh_D10G0406,Gh_D01G1508,Gh_D05G0313,Gh_D11G2374,Gh_D01G1967,Gh_A06G1303,Gh_D11G1066,Gh_D02G2126…	0
Biological process	plastid organization	GO:0009657	5	0	6.94054	56	247	1477	45215	Gh_A11G2068,Gh_D13G0392,Gh_A10G1822,Gh_D06G0066,Gh_A05G1914,Gh_A01G1807,Gh_A01G0953,Gh_D12G2267,Gh_A03G1451,Gh_A10G1265,Gh_A05G2450,Gh_A01G0139,Gh_D11G2828,Gh_D02G2192,Gh_A11G3268,Gh_A09G0104,Gh_D03G1379,Gh_A12G1563,Gh_D01G0183,Gh_D01G1001,Gh_D11G0187,Gh_D11G2374,Gh_D10G1779,Gh_D09G0100,Gh_A07G0274,Gh_D01G0682,Gh_A08G1298,Gh_A06G0093,Gh_D05G2149,Gh_A11G0177,Gh_D01G1197,Gh_D12G1691,Gh_D03G1227,Gh_…	0
Biological process	photosynthetic electron transport chain	GO:0009767	6	0	12.5591	32	78	1477	45215	Gh_A05G1017,Gh_D13G0354,Gh_D05G1135,Gh_A10G1862,Gh_D05G1179,Gh_A03G0593,Gh_A03G1706,Gh_A03G1705,Gh_Sca035444G01,Gh_D03G0881,Gh_D13G1343,Gh_A06G1303,Gh_D11G1066,Gh_D02G2126,Gh_D02G2127,Gh_A05G3863,Gh_A11G2345,Gh_A11G3190,Gh_A11G0924,Gh_A01G0275,Gh_D01G0287,Gh_D11G2278,Gh_A13G1078,Gh_D11G0911,Gh_A08G1594,Gh_D10G2127,Gh_A11G1738,Gh_D11G2659,Gh_A11G0782,Gh_D02G1430,Gh_D02G1877,Gh_D08G1904,	0
Biological process	photosynthesis	GO:0015979	4	0	11.7578	111	289	1477	45215	Gh_A13G1201,Gh_D12G0105,Gh_A01G1349,Gh_D07G1528,Gh_D07G0661,Gh_A10G1346,Gh_A11G2068,Gh_D13G1272,Gh_A05G1017,Gh_D13G0354,Gh_D11G1208,Gh_A06G0403,Gh_A02G0295,Gh_D02G0739,Gh_A05G3293,Gh_A01G1717,Gh_D01G2232,Gh_A07G2366,Gh_D07G1090,Gh_A02G0693,Gh_A06G1222,Gh_D02G1996,Gh_D05G1135,Gh_A05G1529,Gh_A07G1431,Gh_D04G0311,Gh_D06G0433,Gh_A10G1862,Gh_D05G1179,Gh_A03G0593,Gh_A05G0229,Gh_D12G0039,Gh_D07G1663,Gh_…	0
Biological process	chlorophyll metabolic process	GO:0015994	7	0	6.3938	33	158	1477	45215	Gh_D04G1284,Gh_A11G2056,Gh_A10G2274,Gh_D06G2150,Gh_A10G2292,Gh_D09G1997,Gh_A03G0591,Gh_A08G2520,Gh_A01G0139,Gh_A05G3766,Gh_A10G1223,Gh_D03G0876,Gh_A06G1826,Gh_D01G0183,Gh_D05G3825,Gh_D02G0797,Gh_A10G0282,Gh_D07G0474,Gh_A09G2286,Gh_D10G1660,Gh_D10G1640,Gh_D10G1271,Gh_A04G0903,Gh_D04G1452,Gh_D04G1415,Gh_D04G1379,Gh_A10G2305,Gh_A04G0879,Gh_D08G2756,Gh_D13G1533,Gh_D10G0283,Gh_Sca039832G01,Gh_A07G0409,	0
Biological process	chlorophyll biosynthetic process	GO:0015995	8	0	8.25213	31	115	1477	45215	Gh_D04G1284,Gh_A11G2056,Gh_A10G2274,Gh_D06G2150,Gh_A10G2292,Gh_D09G1997,Gh_A03G0591,Gh_A08G2520,Gh_A01G0139,Gh_A05G3766,Gh_A10G1223,Gh_D03G0876,Gh_A06G1826,Gh_D01G0183,Gh_D05G3825,Gh_D02G0797,Gh_A10G0282,Gh_D07G0474,Gh_A09G2286,Gh_D10G1660,Gh_D10G1640,Gh_D10G1271,Gh_A04G0903,Gh_D04G1452,Gh_D04G1415,Gh_D04G1379,Gh_A04G0879,Gh_D08G2756,Gh_D13G1533,Gh_D10G0283,Gh_A07G0409,	0
Biological process	generation of precursor metabolites and energy	GO:0006091	4	0	5.82423	82	431	1477	45215	Gh_A13G1201,Gh_D09G2090,Gh_D12G0105,Gh_A01G1349,Gh_A10G1346,Gh_A11G2068,Gh_D13G1272,Gh_A05G1017,Gh_D13G0354,Gh_A08G0863,Gh_D11G1208,Gh_A05G3293,Gh_A01G1717,Gh_D07G1090,Gh_D01G1853,Gh_D07G2359,Gh_D05G1135,Gh_A05G1529,Gh_D04G0311,Gh_A10G1862,Gh_D05G1179,Gh_A03G0593,Gh_A12G1903,Gh_A05G0229,Gh_A03G1706,Gh_A03G1705,Gh_Sca035444G01,Gh_D07G1624,Gh_D03G0881,Gh_D13G1343,Gh_D01G1028,Gh_D10G0406,Gh_D01G2339…	0
Biological process	metabolic process	GO:0008152	2	0	1.27925	759	18163	1477	45215	Gh_A04G0790,Gh_A13G1201,Gh_D09G2090,Gh_A04G0306,Gh_A08G0463,Gh_A11G2096,Gh_D12G0105,Gh_A05G1001,Gh_A13G1680,Gh_A01G1349,Gh_A09G2025,Gh_D07G1528,Gh_A10G2216,Gh_A10G1363,Gh_A13G1665,Gh_A05G3645,Gh_D12G0564,Gh_D07G0661,Gh_D08G0078,Gh_A02G1185,Gh_D13G2177,Gh_A05G2787,Gh_A05G1455,Gh_D12G0578,Gh_D03G0508,Gh_D04G1284,Gh_A10G1346,Gh_D11G0781,Gh_A06G0802,Gh_D09G2054,Gh_A01G1778,Gh_A11G2056,Gh_A10G1359,Gh_…	0
Biological process	cofactor metabolic process	GO:0051186	4	0	3.26647	78	731	1477	45215	Gh_D12G0578,Gh_D04G1284,Gh_A11G2056,Gh_A12G0562,Gh_A08G0863,Gh_A02G1114,Gh_A05G3249,Gh_A10G2274,Gh_D06G2150,Gh_A10G2292,Gh_D09G1997,Gh_D07G2359,Gh_A05G1529,Gh_D10G1484,Gh_A03G0591,Gh_A08G2520,Gh_D03G1747,Gh_A05G2450,Gh_A01G0139,Gh_A13G1301,Gh_A05G3766,Gh_A10G1223,Gh_D03G0876,Gh_D09G0630,Gh_D03G0021,Gh_A13G0851,Gh_D13G1343,Gh_A06G1826,Gh_A02G1698,Gh_D01G0183,Gh_D11G1105,Gh_D05G3825,Gh_D02G0797,Gh_…	0
Biological process	cofactor biosynthetic process	GO:0051188	5	0	3.55691	61	525	1477	45215	Gh_D04G1284,Gh_A11G2056,Gh_A08G0863,Gh_A05G3249,Gh_A10G2274,Gh_D06G2150,Gh_A10G2292,Gh_D09G1997,Gh_D07G2359,Gh_A05G1529,Gh_D10G1484,Gh_A03G0591,Gh_A08G2520,Gh_D03G1747,Gh_A01G0139,Gh_A13G1301,Gh_A05G3766,Gh_A10G1223,Gh_D03G0876,Gh_D09G0630,Gh_A13G0851,Gh_A06G1826,Gh_D01G0183,Gh_D11G1105,Gh_D05G3825,Gh_D02G0797,Gh_A10G0282,Gh_D07G0488,Gh_D07G0474,Gh_A06G1917,Gh_A09G2286,Gh_D05G1700,Gh_A08G0643,Gh_…	0
Biological process	tetrapyrrole biosynthetic process	GO:0033014	6	1.11022e-16	7.41551	39	161	1477	45215	Gh_A08G0463,Gh_D04G1284,Gh_A11G2056,Gh_A05G3249,Gh_A10G2274,Gh_D06G2150,Gh_A10G2292,Gh_D09G1997,Gh_D08G0549,Gh_A03G0591,Gh_A08G2520,Gh_A01G0139,Gh_A05G3766,Gh_A10G1223,Gh_D03G0876,Gh_A06G1826,Gh_D01G0183,Gh_D11G1105,Gh_D05G3825,Gh_D02G0797,Gh_A10G0282,Gh_D07G0488,Gh_D07G0474,Gh_A06G1917,Gh_A09G2286,Gh_D10G1660,Gh_D10G1640,Gh_D10G1271,Gh_A04G0903,Gh_D04G1452,Gh_D04G1415,Gh_D04G1379,Gh_A05G2230,Gh_…	1.04292e-14
Biological process	pigment biosynthetic process	GO:0046148	4	1.11022e-16	4.94867	43	266	1477	45215	Gh_D04G1284,Gh_A11G2056,Gh_A05G3249,Gh_A10G2274,Gh_D13G1644,Gh_D06G2150,Gh_A10G2292,Gh_D09G1997,Gh_A11G2878,Gh_A03G0591,Gh_A05G0229,Gh_A08G2520,Gh_A01G0139,Gh_A05G3766,Gh_A10G1223,Gh_D03G0876,Gh_A06G1826,Gh_D01G0183,Gh_D07G0746,Gh_D05G3825,Gh_D05G0313,Gh_D12G2176,Gh_D11G3263,Gh_D02G0797,Gh_A07G0668,Gh_A13G1336,Gh_D01G1197,Gh_A10G0282,Gh_D07G0474,Gh_A09G2286,Gh_D10G1660,Gh_D10G1640,Gh_A11G1774,Gh_…	1.04292e-14
Biological process	response to radiation	GO:0009314	4	1.11022e-16	2.57156	115	1369	1477	45215	Gh_A13G1665,Gh_D10G2299,Gh_D04G1229,Gh_A03G1831,Gh_A04G0748,Gh_D02G2060,Gh_A11G2068,Gh_A08G1300,Gh_D11G1671,Gh_D13G0354,Gh_D05G0606,Gh_A01G0439,Gh_D07G1964,Gh_D07G0636,Gh_D08G1373,Gh_A03G0935,Gh_D01G2232,Gh_A07G2366,Gh_A09G1935,Gh_A11G1510,Gh_D01G1889,Gh_D06G1799,Gh_D02G1996,Gh_A07G0114,Gh_A05G1529,Gh_D09G2008,Gh_A04G0721,Gh_D12G2691,Gh_D05G1179,Gh_A05G1564,Gh_A05G3730,Gh_D01G1810,Gh_D07G1663,Gh_…	1.04292e-14
Biological process	chloroplast organization	GO:0009658	6	1.11022e-16	7.31625	38	159	1477	45215	Gh_A11G2068,Gh_D13G0392,Gh_D06G0066,Gh_A05G1914,Gh_A01G1807,Gh_A01G0953,Gh_D12G2267,Gh_A01G0139,Gh_D11G2828,Gh_D02G2192,Gh_A11G3268,Gh_A09G0104,Gh_D03G1379,Gh_A12G1563,Gh_D01G0183,Gh_D01G1001,Gh_D11G0187,Gh_D11G2374,Gh_D09G0100,Gh_D01G0682,Gh_A08G1298,Gh_A06G0093,Gh_D05G2149,Gh_A11G0177,Gh_D12G1691,Gh_A01G0662,Gh_D08G1590,Gh_D01G2010,Gh_A05G0854,Gh_A05G0855,Gh_D04G1379,Gh_A04G0879,Gh_D02G1983,Gh_…	1.04292e-14
Biological process	pigment metabolic process	GO:0042440	3	1.11022e-16	4.5388	47	317	1477	45215	Gh_D04G1284,Gh_A11G2056,Gh_A05G3249,Gh_A10G2274,Gh_D13G1644,Gh_D06G2150,Gh_A10G2292,Gh_D09G1997,Gh_A11G2878,Gh_A03G0591,Gh_A05G0229,Gh_A08G2520,Gh_A01G0139,Gh_A05G3766,Gh_A10G1223,Gh_D03G0876,Gh_A06G1826,Gh_D01G0183,Gh_D07G0746,Gh_D05G3825,Gh_D05G0313,Gh_D12G2176,Gh_D11G3263,Gh_D02G0797,Gh_A07G0668,Gh_D05G2172,Gh_A13G1336,Gh_D01G1197,Gh_A10G0282,Gh_D07G0474,Gh_A06G1917,Gh_A09G2286,Gh_D10G1660,Gh_…	1.04292e-14
Biological process	photosynthetic electron transport in photosystem I	GO:0009773	7	1.11022e-16	15.7702	17	33	1477	45215	Gh_A05G1017,Gh_D05G1135,Gh_A03G0593,Gh_D03G0881,Gh_D13G1343,Gh_D11G1066,Gh_A11G2345,Gh_A11G3190,Gh_A11G0924,Gh_A01G0275,Gh_D01G0287,Gh_D11G2278,Gh_A13G1078,Gh_A08G1594,Gh_D11G2659,Gh_D02G1430,Gh_D08G1904,	1.04292e-14
Biological process	response to blue light	GO:0009637	6	3.33067e-16	6.62514	29	134	1477	45215	Gh_D11G1671,Gh_A01G0439,Gh_D07G0636,Gh_D01G2232,Gh_A07G2366,Gh_A11G1510,Gh_D12G2691,Gh_D07G1663,Gh_D07G1659,Gh_A02G0384,Gh_A11G1509,Gh_D05G2172,Gh_D07G1759,Gh_A05G2108,Gh_A01G1972,Gh_D05G0860,Gh_A07G2172,Gh_A05G0854,Gh_A05G0855,Gh_A03G2165,Gh_D07G0125,Gh_D03G0610,Gh_D11G2686,Gh_A08G1808,Gh_D08G2338,Gh_A03G0296,Gh_D11G3048,Gh_D05G2361,Gh_A08G2347,	2.27545e-14
Biological process	protein import into chloroplast thylakoid membrane	GO:0045038	12	3.55271e-15	25.9031	11	13	1477	45215	Gh_A03G1831,Gh_D03G1227,Gh_D04G0945,Gh_D09G0425,Gh_A09G0408,Gh_D02G2264,Gh_D11G0911,Gh_A03G0350,Gh_D04G1433,Gh_A04G0918,Gh_A11G0782,	2.32162e-13
Biological process	response to abiotic stimulus	GO:0009628	3	1.70974e-14	1.74342	195	3424	1477	45215	Gh_D04G1252,Gh_A13G1665,Gh_D10G2299,Gh_D04G1229,Gh_A03G1831,Gh_A04G0748,Gh_A12G1862,Gh_D02G2060,Gh_A11G2068,Gh_A04G0767,Gh_D03G1842,Gh_A05G2354,Gh_A08G1300,Gh_D11G1671,Gh_A06G0847,Gh_D13G0354,Gh_D05G0606,Gh_A11G0767,Gh_A01G0439,Gh_D07G1964,Gh_D07G0636,Gh_D01G2215,Gh_D08G1373,Gh_A01G1714,Gh_A09G0259,Gh_A03G0935,Gh_D01G2232,Gh_D05G1529,Gh_A07G2366,Gh_A09G1935,Gh_D01G1853,Gh_A12G2374,Gh_A11G1510,Gh_…	1.07073e-12
Biological process	oxidation-reduction process	GO:0055114	3	4.25215e-14	3.13272	57	557	1477	45215	Gh_D09G2090,Gh_D12G0564,Gh_A05G1017,Gh_D13G0354,Gh_A11G1609,Gh_A10G2254,Gh_D05G2401,Gh_D01G1853,Gh_D05G1135,Gh_A10G1862,Gh_D05G1179,Gh_A03G0593,Gh_A12G1903,Gh_A05G0686,Gh_A03G1706,Gh_A03G1705,Gh_Sca035444G01,Gh_D03G0881,Gh_D13G1343,Gh_D01G2339,Gh_A06G1303,Gh_D11G1066,Gh_A09G1890,Gh_A05G3805,Gh_D02G2126,Gh_D02G2127,Gh_A05G3863,Gh_A01G0183,Gh_A11G2345,Gh_D05G2172,Gh_A11G3190,Gh_A11G0924,Gh_A07G0837…	2.5564e-12
Biological process	organonitrogen compound biosynthetic process	GO:1901566	5	4.19997e-13	1.78474	164	2813	1477	45215	Gh_A04G0306,Gh_A08G0463,Gh_A13G1680,Gh_A09G2025,Gh_D04G1284,Gh_D09G2054,Gh_A11G2056,Gh_A05G2354,Gh_A08G0863,Gh_D13G1698,Gh_A05G3249,Gh_D10G1805,Gh_Sca004857G04,Gh_A10G2274,Gh_D06G2150,Gh_A10G2292,Gh_D01G2216,Gh_D08G2696,Gh_D13G0351,Gh_A10G1822,Gh_D05G1529,Gh_D05G2856,Gh_A10G0983,Gh_A05G1914,Gh_A08G0924,Gh_D04G0745,Gh_D09G1997,Gh_A13G1298,Gh_D08G0549,Gh_A10G0927,Gh_D07G2359,Gh_A05G1529,Gh_D05G3347…	2.42791e-11
Biological process	establishment of protein localization to chloroplast	GO:0072596	8	1.47282e-12	9.29315	17	56	1477	45215	Gh_A03G1831,Gh_D03G1379,Gh_D09G2309,Gh_A11G0935,Gh_D03G1227,Gh_D13G0102,Gh_D04G0945,Gh_D09G0425,Gh_A09G0408,Gh_D02G2264,Gh_D11G0911,Gh_A03G0350,Gh_D04G1433,Gh_A04G0918,Gh_A09G2102,Gh_A11G0782,Gh_A03G0202,	8.19871e-11
Biological process	protein localization to chloroplast	GO:0072598	7	1.47282e-12	9.29315	17	56	1477	45215	Gh_A03G1831,Gh_D03G1379,Gh_D09G2309,Gh_A11G0935,Gh_D03G1227,Gh_D13G0102,Gh_D04G0945,Gh_D09G0425,Gh_A09G0408,Gh_D02G2264,Gh_D11G0911,Gh_A03G0350,Gh_D04G1433,Gh_A04G0918,Gh_A09G2102,Gh_A11G0782,Gh_A03G0202,	8.19871e-11
Biological process	protein targeting to chloroplast	GO:0045036	11	1.47282e-12	9.29315	17	56	1477	45215	Gh_A03G1831,Gh_D03G1379,Gh_D09G2309,Gh_A11G0935,Gh_D03G1227,Gh_D13G0102,Gh_D04G0945,Gh_D09G0425,Gh_A09G0408,Gh_D02G2264,Gh_D11G0911,Gh_A03G0350,Gh_D04G1433,Gh_A04G0918,Gh_A09G2102,Gh_A11G0782,Gh_A03G0202,	8.19871e-11
Biological process	response to cold	GO:0009409	5	3.87157e-12	2.64554	63	729	1477	45215	Gh_A13G1665,Gh_D10G2299,Gh_A12G1862,Gh_D03G1842,Gh_A05G2354,Gh_A06G0847,Gh_A11G0767,Gh_D08G1373,Gh_A09G0259,Gh_D05G1529,Gh_A09G1935,Gh_A12G2374,Gh_D02G0203,Gh_D06G1799,Gh_A05G1529,Gh_A04G0721,Gh_D09G0259,Gh_D01G1810,Gh_D12G2659,Gh_D06G0983,Gh_D11G2828,Gh_A11G3268,Gh_A06G1810,Gh_D08G2524,Gh_D03G0021,Gh_D03G0048,Gh_D02G1726,Gh_A02G1698,Gh_A07G2024,Gh_A11G0588,Gh_D09G0572,Gh_D05G1677,Gh_A11G1879,Gh_…	1.93966e-10
Biological process	cellular metabolic process	GO:0044237	3	1.86777e-11	1.24644	607	14908	1477	45215	Gh_A04G0790,Gh_A13G1201,Gh_D09G2090,Gh_A04G0306,Gh_A08G0463,Gh_A11G2096,Gh_D12G0105,Gh_A13G1680,Gh_A01G1349,Gh_A09G2025,Gh_D07G1528,Gh_A10G2216,Gh_A10G1363,Gh_A13G1665,Gh_D07G0661,Gh_A02G1185,Gh_A05G1455,Gh_D12G0578,Gh_D03G0508,Gh_D04G1284,Gh_A10G1346,Gh_D11G0781,Gh_A06G0802,Gh_D09G2054,Gh_A11G2056,Gh_A10G1359,Gh_D07G2410,Gh_A11G2068,Gh_D13G1272,Gh_A12G0562,Gh_A08G1770,Gh_Sca010556G01,Gh_A05G2354…	9.05568e-10
Biological process	cellular process	GO:0009987	2	2.36731e-11	1.19105	776	19945	1477	45215	Gh_A04G0790,Gh_A10G1389,Gh_A13G1201,Gh_D09G2090,Gh_A04G0306,Gh_A08G0463,Gh_A11G2096,Gh_D12G0105,Gh_D04G1252,Gh_A13G1680,Gh_A01G1349,Gh_A09G2025,Gh_D07G1528,Gh_A10G2216,Gh_D11G2949,Gh_A10G1363,Gh_A13G1665,Gh_D07G0661,Gh_A08G0009,Gh_A02G1185,Gh_D13G2177,Gh_A05G1455,Gh_D04G1229,Gh_D12G0578,Gh_D03G0508,Gh_D04G1284,Gh_A10G1346,Gh_D11G0781,Gh_A05G2385,Gh_A06G0802,Gh_A04G0748,Gh_D09G2054,Gh_A11G2056,Gh_…	1.11189e-09
Biological process	plastid membrane organization	GO:0009668	5	1.84606e-10	9.11869	14	47	1477	45215	Gh_A11G2068,Gh_A10G1265,Gh_A05G2450,Gh_D11G2374,Gh_A07G0274,Gh_D03G1227,Gh_D10G1219,Gh_D11G0911,Gh_A03G0350,Gh_D04G1433,Gh_A04G0918,Gh_A12G1799,Gh_D12G1968,Gh_A11G0782,	8.40795e-09
Biological process	thylakoid membrane organization	GO:0010027	6	1.84606e-10	9.11869	14	47	1477	45215	Gh_A11G2068,Gh_A10G1265,Gh_A05G2450,Gh_D11G2374,Gh_A07G0274,Gh_D03G1227,Gh_D10G1219,Gh_D11G0911,Gh_A03G0350,Gh_D04G1433,Gh_A04G0918,Gh_A12G1799,Gh_D12G1968,Gh_A11G0782,	8.40795e-09
Biological process	translation	GO:0006412	8	2.15843e-10	1.99056	95	1461	1477	45215	Gh_A04G0306,Gh_A09G2025,Gh_D09G2054,Gh_A05G2354,Gh_D13G1698,Gh_D10G1805,Gh_Sca004857G04,Gh_D01G2216,Gh_D08G2696,Gh_A10G1822,Gh_D05G1529,Gh_D05G2856,Gh_A10G0983,Gh_A05G1914,Gh_A08G0924,Gh_D04G0745,Gh_A13G1298,Gh_A10G0927,Gh_D05G3347,Gh_D02G1151,Gh_A05G1564,Gh_D08G0959,Gh_D11G2849,Gh_A08G0786,Gh_A06G1810,Gh_A08G0732,Gh_D02G1733,Gh_D10G0843,Gh_A03G2187,Gh_D06G0079,Gh_D10G1779,Gh_A03G0056,Gh_D08G0869…	9.26891e-09
Biological process	response to far red light	GO:0010218	7	2.263e-10	5.77599	20	106	1477	45215	Gh_D11G1671,Gh_D07G0636,Gh_D01G2232,Gh_A07G2366,Gh_A11G1510,Gh_D12G2691,Gh_D07G1663,Gh_D07G1659,Gh_A11G1509,Gh_D11G0266,Gh_D07G1759,Gh_A05G2108,Gh_A01G1972,Gh_D05G0860,Gh_A07G2172,Gh_D07G0125,Gh_D03G0610,Gh_D11G2686,Gh_A11G2970,Gh_D05G2361,	9.44804e-09
Biological process	carbon fixation	GO:0015977	4	2.65352e-10	11.1319	12	33	1477	45215	Gh_D11G1671,Gh_A11G1510,Gh_A05G1529,Gh_A11G1509,Gh_D12G1258,Gh_D07G1759,Gh_A11G2295,Gh_A07G2172,Gh_A10G2060,Gh_D05G1700,Gh_D11G2606,Gh_D10G2468,	1.0779e-08
Biological process	peptide biosynthetic process	GO:0043043	7	2.86863e-10	1.97972	95	1469	1477	45215	Gh_A04G0306,Gh_A09G2025,Gh_D09G2054,Gh_A05G2354,Gh_D13G1698,Gh_D10G1805,Gh_Sca004857G04,Gh_D01G2216,Gh_D08G2696,Gh_A10G1822,Gh_D05G1529,Gh_D05G2856,Gh_A10G0983,Gh_A05G1914,Gh_A08G0924,Gh_D04G0745,Gh_A13G1298,Gh_A10G0927,Gh_D05G3347,Gh_D02G1151,Gh_A05G1564,Gh_D08G0959,Gh_D11G2849,Gh_A08G0786,Gh_A06G1810,Gh_A08G0732,Gh_D02G1733,Gh_D10G0843,Gh_A03G2187,Gh_D06G0079,Gh_D10G1779,Gh_A03G0056,Gh_D08G0869…	1.13462e-08
Biological process	amide biosynthetic process	GO:0043604	6	4.58503e-10	1.94589	97	1526	1477	45215	Gh_A04G0306,Gh_A09G2025,Gh_D09G2054,Gh_A05G2354,Gh_D13G1698,Gh_D10G1805,Gh_Sca004857G04,Gh_D01G2216,Gh_D08G2696,Gh_A10G1822,Gh_D05G1529,Gh_D05G2856,Gh_A10G0983,Gh_A05G1914,Gh_A08G0924,Gh_D04G0745,Gh_A13G1298,Gh_A10G0927,Gh_D05G3347,Gh_D02G1151,Gh_A05G1564,Gh_D08G0959,Gh_D11G2849,Gh_A08G0786,Gh_A06G1810,Gh_A08G0732,Gh_D09G0630,Gh_D02G1733,Gh_D10G0843,Gh_A03G2187,Gh_D06G0079,Gh_D10G1779,Gh_A03G0056…	1.767e-08
Biological process	peptide metabolic process	GO:0006518	6	9.29379e-10	1.93494	95	1503	1477	45215	Gh_A04G0306,Gh_A09G2025,Gh_D09G2054,Gh_A05G2354,Gh_D13G1698,Gh_D10G1805,Gh_Sca004857G04,Gh_D01G2216,Gh_D08G2696,Gh_A10G1822,Gh_D05G1529,Gh_D05G2856,Gh_A10G0983,Gh_A05G1914,Gh_A08G0924,Gh_D04G0745,Gh_A13G1298,Gh_A10G0927,Gh_D05G3347,Gh_D02G1151,Gh_A05G1564,Gh_D08G0959,Gh_D11G2849,Gh_A08G0786,Gh_A06G1810,Gh_A08G0732,Gh_D02G1733,Gh_D10G0843,Gh_A03G2187,Gh_D06G0079,Gh_D10G1779,Gh_A03G0056,Gh_D08G0869…	3.49214e-08
Biological process	NADH dehydrogenase complex assembly	GO:0010257	7	1.20314e-09	30.6127	6	6	1477	45215	Gh_A10G1389,Gh_D10G1064,Gh_D03G1740,Gh_D13G0173,Gh_A13G0152,Gh_A02G1095,	4.41053e-08
Biological process	NADH dehydrogenase complex (plastoquinone) assembly	GO:0010258	8	1.20314e-09	30.6127	6	6	1477	45215	Gh_A10G1389,Gh_D10G1064,Gh_D03G1740,Gh_D13G0173,Gh_A13G0152,Gh_A02G1095,	4.41053e-08
Biological process	glycine decarboxylation via glycine cleavage system	GO:0019464	12	1.33027e-09	23.8099	7	9	1477	45215	Gh_A06G0802,Gh_D06G0920,Gh_A03G0026,Gh_A11G1879,Gh_A05G0330,Gh_D03G1625,Gh_D05G0435,	4.64977e-08
Biological process	energy quenching	GO:1990066	6	1.41509e-09	18.8386	8	13	1477	45215	Gh_D02G1996,Gh_A05G3730,Gh_Sca004987G01,Gh_A01G1598,Gh_A05G2108,Gh_A03G2154,Gh_D02G1877,Gh_D05G2361,	4.83382e-08
Biological process	nonphotochemical quenching	GO:0010196	7	1.41509e-09	18.8386	8	13	1477	45215	Gh_D02G1996,Gh_A05G3730,Gh_Sca004987G01,Gh_A01G1598,Gh_A05G2108,Gh_A03G2154,Gh_D02G1877,Gh_D05G2361,	4.83382e-08
Biological process	starch biosynthetic process	GO:0019252	9	2.80404e-09	12.2451	10	25	1477	45215	Gh_A05G1455,Gh_D07G1964,Gh_A12G2374,Gh_D12G2659,Gh_D11G1508,Gh_D05G1629,Gh_A10G2060,Gh_A11G1361,Gh_D10G2468,Gh_A07G1759,	9.1619e-08
Biological process	photosystem II assembly	GO:0010207	7	2.84145e-09	14.5008	9	19	1477	45215	Gh_A11G2068,Gh_D11G1208,Gh_D11G2374,Gh_A07G0334,Gh_D04G1433,Gh_A04G0918,Gh_A04G0428,Gh_D05G3193,Gh_A11G1738,	9.08659e-08
Biological process	response to red light	GO:0010114	7	4.8596e-09	4.65846	21	138	1477	45215	Gh_D11G1671,Gh_D07G0636,Gh_D01G2232,Gh_A07G2366,Gh_A11G1510,Gh_D12G2691,Gh_D07G1663,Gh_D07G1659,Gh_A11G1509,Gh_D07G1759,Gh_A05G2108,Gh_A01G1972,Gh_D05G0860,Gh_A07G2172,Gh_A11G1774,Gh_D07G0125,Gh_D11G2686,Gh_D08G2338,Gh_D11G3048,Gh_D05G2361,Gh_A08G2347,	1.52166e-07
Biological process	cellular amide metabolic process	GO:0043603	5	5.78534e-09	1.85127	97	1604	1477	45215	Gh_A04G0306,Gh_A09G2025,Gh_D09G2054,Gh_A05G2354,Gh_D13G1698,Gh_D10G1805,Gh_Sca004857G04,Gh_D01G2216,Gh_D08G2696,Gh_A10G1822,Gh_D05G1529,Gh_D05G2856,Gh_A10G0983,Gh_A05G1914,Gh_A08G0924,Gh_D04G0745,Gh_A13G1298,Gh_A10G0927,Gh_D05G3347,Gh_D02G1151,Gh_A05G1564,Gh_D08G0959,Gh_D11G2849,Gh_A08G0786,Gh_A06G1810,Gh_A08G0732,Gh_D09G0630,Gh_D02G1733,Gh_D10G0843,Gh_A03G2187,Gh_D06G0079,Gh_D10G1779,Gh_A03G0056…	1.77456e-07
Biological process	wax biosynthetic process	GO:0010025	6	1.14049e-08	7.50878	13	53	1477	45215	Gh_D13G2177,Gh_D08G1373,Gh_D01G1810,Gh_A07G0999,Gh_D02G1726,Gh_A07G1181,Gh_A06G1390,Gh_A01G1563,Gh_A03G1286,Gh_A07G1227,Gh_A08G2454,Gh_D07G1281,Gh_D01G1776,	3.42831e-07
Biological process	wax metabolic process	GO:0010166	5	1.85121e-08	7.23574	13	55	1477	45215	Gh_D13G2177,Gh_D08G1373,Gh_D01G1810,Gh_A07G0999,Gh_D02G1726,Gh_A07G1181,Gh_A06G1390,Gh_A01G1563,Gh_A03G1286,Gh_A07G1227,Gh_A08G2454,Gh_D07G1281,Gh_D01G1776,	5.45563e-07
Biological process	fatty acid derivative biosynthetic process	GO:1901570	5	2.33883e-08	7.10653	13	56	1477	45215	Gh_D13G2177,Gh_D08G1373,Gh_D01G1810,Gh_A07G0999,Gh_D02G1726,Gh_A07G1181,Gh_A06G1390,Gh_A01G1563,Gh_A03G1286,Gh_A07G1227,Gh_A08G2454,Gh_D07G1281,Gh_D01G1776,	6.76013e-07
Biological process	amino acid activation	GO:0043038	8	2.96774e-08	4.40471	20	139	1477	45215	Gh_A09G2025,Gh_A05G1914,Gh_A03G2187,Gh_A06G1328,Gh_D10G1375,Gh_D05G2149,Gh_A10G1125,Gh_A09G1755,Gh_D01G0339,Gh_D02G2279,Gh_D10G1243,Gh_D09G2236,Gh_D12G2443,Gh_Sca004851G02,Gh_A01G0305,Gh_A10G1936,Gh_D10G2435,Gh_D09G0774,Gh_A09G0774,Gh_D06G1657,	8.41606e-07
Biological process	tRNA aminoacylation	GO:0043039	10	2.96774e-08	4.40471	20	139	1477	45215	Gh_A09G2025,Gh_A05G1914,Gh_A03G2187,Gh_A06G1328,Gh_D10G1375,Gh_D05G2149,Gh_A10G1125,Gh_A09G1755,Gh_D01G0339,Gh_D02G2279,Gh_D10G1243,Gh_D09G2236,Gh_D12G2443,Gh_Sca004851G02,Gh_A01G0305,Gh_A10G1936,Gh_D10G2435,Gh_D09G0774,Gh_A09G0774,Gh_D06G1657,	8.41606e-07
Biological process	tRNA aminoacylation for protein translation	GO:0006418	11	2.96774e-08	4.40471	20	139	1477	45215	Gh_A09G2025,Gh_A05G1914,Gh_A03G2187,Gh_A06G1328,Gh_D10G1375,Gh_D05G2149,Gh_A10G1125,Gh_A09G1755,Gh_D01G0339,Gh_D02G2279,Gh_D10G1243,Gh_D09G2236,Gh_D12G2443,Gh_Sca004851G02,Gh_A01G0305,Gh_A10G1936,Gh_D10G2435,Gh_D09G0774,Gh_A09G0774,Gh_D06G1657,	8.41606e-07
Biological process	tetraterpenoid biosynthetic process	GO:0016109	9	3.14568e-08	8.63436	11	39	1477	45215	Gh_A11G2056,Gh_D13G1644,Gh_A11G2878,Gh_A05G0229,Gh_D07G0746,Gh_D05G0313,Gh_D11G3263,Gh_A07G0668,Gh_A13G1336,Gh_D01G1197,Gh_A11G1774,	8.44277e-07
Biological process	carotenoid biosynthetic process	GO:0016117	10	3.14568e-08	8.63436	11	39	1477	45215	Gh_A11G2056,Gh_D13G1644,Gh_A11G2878,Gh_A05G0229,Gh_D07G0746,Gh_D05G0313,Gh_D11G3263,Gh_A07G0668,Gh_A13G1336,Gh_D01G1197,Gh_A11G1774,	8.44277e-07
Biological process	plastid localization	GO:0051644	5	5.26295e-08	11.0206	9	25	1477	45215	Gh_D06G0066,Gh_A01G0953,Gh_A12G1563,Gh_D01G1001,Gh_A06G0093,Gh_D12G1691,Gh_A05G0854,Gh_A05G0855,Gh_A03G0296,	1.36383e-06
Biological process	establishment of plastid localization	GO:0051667	6	5.26295e-08	11.0206	9	25	1477	45215	Gh_D06G0066,Gh_A01G0953,Gh_A12G1563,Gh_D01G1001,Gh_A06G0093,Gh_D12G1691,Gh_A05G0854,Gh_A05G0855,Gh_A03G0296,	1.36383e-06
Biological process	chloroplast localization	GO:0019750	6	5.26295e-08	11.0206	9	25	1477	45215	Gh_D06G0066,Gh_A01G0953,Gh_A12G1563,Gh_D01G1001,Gh_A06G0093,Gh_D12G1691,Gh_A05G0854,Gh_A05G0855,Gh_A03G0296,	1.36383e-06
Biological process	chloroplast relocation	GO:0009902	7	5.26295e-08	11.0206	9	25	1477	45215	Gh_D06G0066,Gh_A01G0953,Gh_A12G1563,Gh_D01G1001,Gh_A06G0093,Gh_D12G1691,Gh_A05G0854,Gh_A05G0855,Gh_A03G0296,	1.36383e-06
Biological process	protein transmembrane import into intracellular organelle	GO:0044743	10	5.58447e-08	8.21317	11	41	1477	45215	Gh_A03G1831,Gh_D03G1227,Gh_D04G0945,Gh_D09G0425,Gh_A09G0408,Gh_D02G2264,Gh_D11G0911,Gh_A03G0350,Gh_D04G1433,Gh_A04G0918,Gh_A11G0782,	1.35378e-06
Biological process	chloroplast avoidance movement	GO:0009903	8	5.65057e-08	16.4838	7	13	1477	45215	Gh_D06G0066,Gh_A01G0953,Gh_D01G1001,Gh_A06G0093,Gh_A05G0854,Gh_A05G0855,Gh_A03G0296,	1.34807e-06
Biological process	chloroplast accumulation movement	GO:0009904	8	5.65057e-08	16.4838	7	13	1477	45215	Gh_D06G0066,Gh_A01G0953,Gh_D01G1001,Gh_A06G0093,Gh_A05G0854,Gh_A05G0855,Gh_A03G0296,	1.34807e-06
Biological process	protein transmembrane transport	GO:0071806	9	5.66373e-08	6.63276	13	60	1477	45215	Gh_A03G1831,Gh_D03G1379,Gh_D03G1227,Gh_D04G0945,Gh_D09G0425,Gh_A09G0408,Gh_D02G2264,Gh_D11G0911,Gh_A03G0350,Gh_D04G1433,Gh_A04G0918,Gh_A11G0782,Gh_A03G0202,	1.30963e-06
Biological process	intracellular protein transmembrane transport	GO:0065002	10	5.66373e-08	6.63276	13	60	1477	45215	Gh_A03G1831,Gh_D03G1379,Gh_D03G1227,Gh_D04G0945,Gh_D09G0425,Gh_A09G0408,Gh_D02G2264,Gh_D11G0911,Gh_A03G0350,Gh_D04G1433,Gh_A04G0918,Gh_A11G0782,Gh_A03G0202,	1.30963e-06
Biological process	response to red or far red light	GO:0009639	6	8.03143e-08	2.63186	38	442	1477	45215	Gh_D04G1229,Gh_A04G0748,Gh_D11G1671,Gh_D07G0636,Gh_A03G0935,Gh_D01G2232,Gh_A07G2366,Gh_A11G1510,Gh_D09G2008,Gh_D12G2691,Gh_D07G1663,Gh_D07G1659,Gh_D03G0895,Gh_A11G1509,Gh_D11G0266,Gh_A09G2314,Gh_A08G1298,Gh_D05G2172,Gh_D07G1759,Gh_A06G1917,Gh_A05G2108,Gh_A01G1972,Gh_D05G0860,Gh_A07G2172,Gh_D08G1590,Gh_A09G0044,Gh_D02G1319,Gh_A11G1774,Gh_D09G0042,Gh_D07G0125,Gh_D03G0610,Gh_D11G2686,Gh_D08G2338,Gh_…	1.80168e-06
Biological process	photorespiration	GO:0009853	5	8.56823e-08	5.46656	15	84	1477	45215	Gh_A02G1185,Gh_D02G1624,Gh_D01G1889,Gh_D13G2270,Gh_A01G1403,Gh_A03G0026,Gh_A11G1879,Gh_D03G1625,Gh_A13G1883,Gh_A01G1505,Gh_Sca048107G01,Gh_D01G1644,Gh_A01G1643,Gh_D01G1750,Gh_A03G1189,	1.89383e-06
Biological process	glyceraldehyde-3-phosphate metabolic process	GO:0019682	6	9.04228e-08	5.87093	14	73	1477	45215	Gh_D12G0578,Gh_A11G2056,Gh_A12G0562,Gh_A09G1555,Gh_A10G2292,Gh_D10G1640,Gh_D13G0294,Gh_D13G0295,Gh_A12G1799,Gh_D12G1968,Gh_D06G1273,Gh_D09G1627,Gh_A13G0275,Gh_A13G0276,	1.96964e-06
Biological process	tRNA metabolic process	GO:0006399	9	1.50248e-07	3.26201	26	244	1477	45215	Gh_A09G2025,Gh_A05G1914,Gh_D05G3327,Gh_A03G2187,Gh_D03G1378,Gh_A06G1328,Gh_D10G1375,Gh_D07G2438,Gh_D05G2149,Gh_A10G1125,Gh_A09G1755,Gh_D01G0339,Gh_D02G2279,Gh_D10G1243,Gh_D09G2236,Gh_D12G2443,Gh_A07G0780,Gh_Sca004851G02,Gh_A01G0305,Gh_D10G0640,Gh_A10G1936,Gh_D10G2435,Gh_D09G0774,Gh_A09G0774,Gh_D06G1657,Gh_A03G0203,	3.22604e-06
Biological process	protein targeting to membrane	GO:0006612	11	1.59141e-07	7.48311	11	45	1477	45215	Gh_A03G1831,Gh_D03G1227,Gh_D04G0945,Gh_D09G0425,Gh_A09G0408,Gh_D02G2264,Gh_D11G0911,Gh_A03G0350,Gh_D04G1433,Gh_A04G0918,Gh_A11G0782,	3.36886e-06
Biological process	glycine catabolic process	GO:0006546	11	1.77105e-07	11.662	8	21	1477	45215	Gh_A06G0802,Gh_A11G0264,Gh_D06G0920,Gh_A03G0026,Gh_A11G1879,Gh_A05G0330,Gh_D03G1625,Gh_D05G0435,	3.69708e-06
Biological process	serine family amino acid catabolic process	GO:0009071	10	1.77105e-07	11.662	8	21	1477	45215	Gh_A06G0802,Gh_A11G0264,Gh_D06G0920,Gh_A03G0026,Gh_A11G1879,Gh_A05G0330,Gh_D03G1625,Gh_D05G0435,	3.69708e-06
Biological process	tetraterpenoid metabolic process	GO:0016108	8	3.13511e-07	6.33367	12	58	1477	45215	Gh_A11G2056,Gh_D13G1644,Gh_A11G2878,Gh_A05G0229,Gh_D07G0746,Gh_D05G0313,Gh_D11G3263,Gh_A07G0668,Gh_A13G1336,Gh_D01G1197,Gh_A11G1774,Gh_D08G0586,	6.36766e-06
Biological process	carotenoid metabolic process	GO:0016116	9	3.13511e-07	6.33367	12	58	1477	45215	Gh_A11G2056,Gh_D13G1644,Gh_A11G2878,Gh_A05G0229,Gh_D07G0746,Gh_D05G0313,Gh_D11G3263,Gh_A07G0668,Gh_A13G1336,Gh_D01G1197,Gh_A11G1774,Gh_D08G0586,	6.36766e-06
Biological process	biosynthetic process	GO:0009058	3	3.18937e-07	1.2687	364	8783	1477	45215	Gh_A04G0790,Gh_A04G0306,Gh_A08G0463,Gh_A13G1680,Gh_A09G2025,Gh_A10G2216,Gh_A10G1363,Gh_A13G1665,Gh_D13G2177,Gh_A05G1455,Gh_D03G0508,Gh_D04G1284,Gh_D09G2054,Gh_A01G1778,Gh_A11G2056,Gh_A12G1862,Gh_D07G2410,Gh_A08G1770,Gh_D03G1842,Gh_A05G2354,Gh_D02G0780,Gh_D13G0358,Gh_A08G0863,Gh_D05G1933,Gh_D13G1698,Gh_A05G3249,Gh_D10G1805,Gh_A01G0439,Gh_A09G1555,Gh_Sca004857G04,Gh_A10G2274,Gh_D12G0943,Gh_D13G1644…	6.3074e-06
Biological process	cellular component organization or biogenesis	GO:0071840	2	3.67539e-07	1.5015	152	3099	1477	45215	Gh_A10G1389,Gh_A04G0306,Gh_A05G2385,Gh_A11G2068,Gh_D13G1272,Gh_A02G1114,Gh_A08G0877,Gh_D10G1805,Gh_D13G0392,Gh_D11G1208,Gh_D03G0111,Gh_D01G0074,Gh_A10G1822,Gh_D05G2856,Gh_D06G0066,Gh_A05G1914,Gh_D05G2893,Gh_A01G1807,Gh_A01G0953,Gh_A03G1039,Gh_D04G0745,Gh_D11G1189,Gh_D12G2267,Gh_D05G3347,Gh_D10G1064,Gh_A03G1451,Gh_D01G1810,Gh_A10G1265,Gh_D03G1740,Gh_A05G2450,Gh_A01G0139,Gh_D11G2828,Gh_A10G2109,Gh_…	7.17418e-06
Biological process	drug catabolic process	GO:0042737	5	5.04191e-07	6.7348	11	50	1477	45215	Gh_A06G0802,Gh_A11G0264,Gh_D06G0920,Gh_D03G0021,Gh_A02G1698,Gh_A03G0026,Gh_A11G1879,Gh_A05G0330,Gh_D03G1625,Gh_D05G0435,Gh_A02G1059,	9.71538e-06
Biological process	cuticle development	GO:0042335	4	6.73239e-07	5.92504	12	62	1477	45215	Gh_A13G1665,Gh_D13G2177,Gh_D08G1373,Gh_D01G1810,Gh_A07G0999,Gh_D02G1726,Gh_A06G1390,Gh_A01G1563,Gh_A03G1286,Gh_A07G1227,Gh_A08G2454,Gh_D13G2029,	1.28086e-05
Biological process	fatty acid derivative metabolic process	GO:1901568	4	7.50832e-07	5.37791	13	74	1477	45215	Gh_D13G2177,Gh_D08G1373,Gh_D01G1810,Gh_A07G0999,Gh_D02G1726,Gh_A07G1181,Gh_A06G1390,Gh_A01G1563,Gh_A03G1286,Gh_A07G1227,Gh_A08G2454,Gh_D07G1281,Gh_D01G1776,	1.41063e-05
Biological process	neurotransmitter catabolic process	GO:0042135	6	8.37726e-07	9.79607	8	25	1477	45215	Gh_A06G0802,Gh_A11G0264,Gh_D06G0920,Gh_A03G0026,Gh_A11G1879,Gh_A05G0330,Gh_D03G1625,Gh_D05G0435,	1.55445e-05
Biological process	reductive pentose-phosphate cycle	GO:0019253	7	9.07575e-07	11.9049	7	18	1477	45215	Gh_A05G1529,Gh_D12G1258,Gh_A11G2295,Gh_A10G2060,Gh_D05G1700,Gh_D11G2606,Gh_D10G2468,	1.66352e-05
Biological process	cytochrome b6f complex assembly	GO:0010190	8	9.38405e-07	15.3064	6	12	1477	45215	Gh_A03G1039,Gh_D11G0678,Gh_D09G0405,Gh_A11G0023,Gh_D11G0021,Gh_D02G1432,	1.6993e-05
Biological process	ncRNA metabolic process	GO:0034660	8	9.85161e-07	2.65825	31	357	1477	45215	Gh_A09G2025,Gh_A10G1822,Gh_A05G1914,Gh_D05G2893,Gh_D05G3327,Gh_D11G2828,Gh_A11G3268,Gh_A03G2187,Gh_D03G1378,Gh_A06G1328,Gh_D10G1375,Gh_D07G2438,Gh_D05G2149,Gh_A10G1125,Gh_A09G1755,Gh_D01G0339,Gh_D02G2279,Gh_D10G1243,Gh_D09G2236,Gh_D12G2443,Gh_A07G0780,Gh_Sca004851G02,Gh_D08G0709,Gh_A01G0305,Gh_D10G0640,Gh_A10G1936,Gh_D10G2435,Gh_D09G0774,Gh_A09G0774,Gh_D06G1657,Gh_A03G0203,	1.76273e-05
Biological process	oxidoreduction coenzyme metabolic process	GO:0006733	6	9.90023e-07	3.21504	23	219	1477	45215	Gh_D12G0578,Gh_A12G0562,Gh_A08G0863,Gh_D07G2359,Gh_A05G1529,Gh_D03G1747,Gh_A13G1301,Gh_D13G1343,Gh_D05G1700,Gh_A07G2148,Gh_D10G0782,Gh_A13G1096,Gh_A13G1078,Gh_A05G3552,Gh_D13G0294,Gh_D13G0295,Gh_A01G0775,Gh_D13G1603,Gh_A10G0618,Gh_D06G1273,Gh_D01G0800,Gh_A13G0275,Gh_A13G0276,	1.75059e-05
Biological process	cellular aldehyde metabolic process	GO:0006081	4	1.02475e-06	4.54644	15	101	1477	45215	Gh_D12G0578,Gh_A11G2056,Gh_A12G0562,Gh_A09G1555,Gh_A10G2292,Gh_D09G2011,Gh_D10G1640,Gh_D13G0294,Gh_D13G0295,Gh_A12G1799,Gh_D12G1968,Gh_D06G1273,Gh_D09G1627,Gh_A13G0275,Gh_A13G0276,	1.79092e-05
Biological process	response to temperature stimulus	GO:0009266	4	1.05554e-06	1.82647	71	1190	1477	45215	Gh_A13G1665,Gh_D10G2299,Gh_A12G1862,Gh_D03G1842,Gh_A05G2354,Gh_A06G0847,Gh_A11G0767,Gh_D08G1373,Gh_A09G0259,Gh_A03G0935,Gh_D05G1529,Gh_A09G1935,Gh_A12G2374,Gh_D02G0203,Gh_D06G1799,Gh_A05G1529,Gh_A04G0721,Gh_D09G0259,Gh_D01G1810,Gh_D12G2659,Gh_D06G0983,Gh_D11G2828,Gh_A11G3268,Gh_A06G1810,Gh_A09G0104,Gh_D08G2524,Gh_D03G0021,Gh_D03G0048,Gh_D02G1726,Gh_A02G1698,Gh_A10G1292,Gh_A07G2024,Gh_A11G0588,Gh_…	1.82353e-05
Biological process	organic substance biosynthetic process	GO:1901576	4	1.20351e-06	1.25786	353	8591	1477	45215	Gh_A04G0790,Gh_A04G0306,Gh_A08G0463,Gh_A13G1680,Gh_A09G2025,Gh_A10G2216,Gh_A10G1363,Gh_A13G1665,Gh_D13G2177,Gh_A05G1455,Gh_D03G0508,Gh_D04G1284,Gh_D09G2054,Gh_A01G1778,Gh_A11G2056,Gh_D07G2410,Gh_A08G1770,Gh_A05G2354,Gh_D02G0780,Gh_D13G0358,Gh_A08G0863,Gh_D05G1933,Gh_D13G1698,Gh_A05G3249,Gh_D10G1805,Gh_A01G0439,Gh_A09G1555,Gh_Sca004857G04,Gh_A10G2274,Gh_D12G0943,Gh_D13G1644,Gh_D03G0111,Gh_D06G2150…	2.05554e-05
Biological process	establishment of protein localization to membrane	GO:0090150	7	1.3907e-06	6.12255	11	55	1477	45215	Gh_A03G1831,Gh_D03G1227,Gh_D04G0945,Gh_D09G0425,Gh_A09G0408,Gh_D02G2264,Gh_D11G0911,Gh_A03G0350,Gh_D04G1433,Gh_A04G0918,Gh_A11G0782,	2.34857e-05
Biological process	protein localization to membrane	GO:0072657	6	1.3907e-06	6.12255	11	55	1477	45215	Gh_A03G1831,Gh_D03G1227,Gh_D04G0945,Gh_D09G0425,Gh_A09G0408,Gh_D02G2264,Gh_D11G0911,Gh_A03G0350,Gh_D04G1433,Gh_A04G0918,Gh_A11G0782,	2.34857e-05
Biological process	pyruvate metabolic process	GO:0006090	8	1.79875e-06	3.56835	19	163	1477	45215	Gh_A11G2056,Gh_A08G0863,Gh_A09G1555,Gh_A10G2292,Gh_D07G2359,Gh_A05G1529,Gh_D09G0630,Gh_D05G1700,Gh_A07G2148,Gh_D10G1640,Gh_D10G0782,Gh_A13G1096,Gh_A05G3552,Gh_A12G1799,Gh_D12G1968,Gh_A01G0775,Gh_A10G0618,Gh_D09G1627,Gh_D01G0800,	2.9709e-05
Biological process	cutin biosynthetic process	GO:0010143	6	1.90555e-06	19.133	5	8	1477	45215	Gh_A07G1181,Gh_D11G0942,Gh_D07G1281,Gh_A11G0804,Gh_D01G1776,	3.11308e-05
Biological process	photosynthesis, dark reaction	GO:0019685	6	2.08739e-06	10.7145	7	20	1477	45215	Gh_A05G1529,Gh_D12G1258,Gh_A11G2295,Gh_A10G2060,Gh_D05G1700,Gh_D11G2606,Gh_D10G2468,	3.3735e-05
Biological process	cellular metabolic compound salvage	GO:0043094	4	2.20601e-06	4.04796	16	121	1477	45215	Gh_A02G1185,Gh_D02G1624,Gh_D01G1889,Gh_D13G2270,Gh_A01G1403,Gh_A03G0026,Gh_D12G2176,Gh_A11G1879,Gh_D03G1625,Gh_A13G1883,Gh_A01G1505,Gh_Sca048107G01,Gh_D01G1644,Gh_A01G1643,Gh_D01G1750,Gh_A03G1189,	3.52727e-05
Biological process	establishment of organelle localization	GO:0051656	5	2.25022e-06	7.44634	9	37	1477	45215	Gh_D06G0066,Gh_A01G0953,Gh_A12G1563,Gh_D01G1001,Gh_A06G0093,Gh_D12G1691,Gh_A05G0854,Gh_A05G0855,Gh_A03G0296,	3.56008e-05
Biological process	pyridine-containing compound metabolic process	GO:0072524	5	2.80755e-06	3.11796	22	216	1477	45215	Gh_D12G0578,Gh_A12G0562,Gh_A08G0863,Gh_D07G2359,Gh_A05G1529,Gh_D03G1747,Gh_D13G1343,Gh_D05G1700,Gh_A07G2148,Gh_D10G0782,Gh_A13G1096,Gh_A13G1078,Gh_A05G3552,Gh_D13G0294,Gh_D13G0295,Gh_A01G0775,Gh_A10G0618,Gh_D06G1273,Gh_D01G0800,Gh_A13G0275,Gh_Sca039832G01,Gh_A13G0276,	4.39556e-05
Biological process	carotene biosynthetic process	GO:0016120	9	3.04254e-06	10.2042	7	21	1477	45215	Gh_A11G2056,Gh_A05G0229,Gh_D05G0313,Gh_A11G2306,Gh_D10G1327,Gh_A10G1167,Gh_A13G1497,	4.71436e-05
Biological process	protein import	GO:0017038	9	3.29947e-06	4.41833	14	97	1477	45215	Gh_A03G1831,Gh_A12G1087,Gh_D03G1379,Gh_D03G1227,Gh_D04G0945,Gh_D09G0425,Gh_A09G0408,Gh_D02G2264,Gh_D11G0911,Gh_A03G0350,Gh_D04G1433,Gh_A04G0918,Gh_A11G0782,Gh_A03G0202,	5.0603e-05
Biological process	pyridine nucleotide metabolic process	GO:0019362	9	3.66376e-06	3.16683	21	203	1477	45215	Gh_D12G0578,Gh_A12G0562,Gh_A08G0863,Gh_D07G2359,Gh_A05G1529,Gh_D03G1747,Gh_D13G1343,Gh_D05G1700,Gh_A07G2148,Gh_D10G0782,Gh_A13G1096,Gh_A13G1078,Gh_A05G3552,Gh_D13G0294,Gh_D13G0295,Gh_A01G0775,Gh_A10G0618,Gh_D06G1273,Gh_D01G0800,Gh_A13G0275,Gh_A13G0276,	5.56225e-05
Biological process	photosynthetic electron transport in photosystem II	GO:0009772	7	4.67114e-06	12.2451	6	15	1477	45215	Gh_Sca035444G01,Gh_A06G1303,Gh_A01G0275,Gh_D01G0287,Gh_D11G0911,Gh_A11G0782,	7.02073e-05
Biological process	nicotinamide nucleotide metabolic process	GO:0046496	10	4.75262e-06	3.22239	20	190	1477	45215	Gh_D12G0578,Gh_A12G0562,Gh_A08G0863,Gh_D07G2359,Gh_A05G1529,Gh_D13G1343,Gh_D05G1700,Gh_A07G2148,Gh_D10G0782,Gh_A13G1096,Gh_A13G1078,Gh_A05G3552,Gh_D13G0294,Gh_D13G0295,Gh_A01G0775,Gh_A10G0618,Gh_D06G1273,Gh_D01G0800,Gh_A13G0275,Gh_A13G0276,	7.07246e-05
Biological process	isoprenoid biosynthetic process	GO:0008299	7	5.14274e-06	2.70725	26	294	1477	45215	Gh_A11G2056,Gh_A09G1555,Gh_D13G1644,Gh_A10G2292,Gh_A11G2878,Gh_A05G0229,Gh_D07G0746,Gh_D05G0313,Gh_A11G2306,Gh_D11G3263,Gh_D10G1327,Gh_A07G0668,Gh_A13G1336,Gh_D01G1197,Gh_D11G1883,Gh_A09G0044,Gh_A10G1167,Gh_D13G0573,Gh_D10G1640,Gh_A11G1774,Gh_A13G1497,Gh_D09G0042,Gh_A12G1799,Gh_A11G1725,Gh_D12G1968,Gh_D09G1627,	7.57798e-05
Biological process	photosynthesis, light harvesting	GO:0009765	5	5.63415e-06	6.71987	9	41	1477	45215	Gh_A01G1349,Gh_D07G1090,Gh_A05G0229,Gh_D01G1028,Gh_D10G0406,Gh_D01G1508,Gh_D05G0313,Gh_D05G0860,Gh_D12G1495,	8.22148e-05
Biological process	cellular component organization	GO:0016043	3	5.92121e-06	1.49127	125	2566	1477	45215	Gh_A10G1389,Gh_A05G2385,Gh_A11G2068,Gh_D13G1272,Gh_A02G1114,Gh_A08G0877,Gh_D13G0392,Gh_D11G1208,Gh_D03G0111,Gh_D01G0074,Gh_A10G1822,Gh_D06G0066,Gh_A05G1914,Gh_A01G1807,Gh_A01G0953,Gh_A03G1039,Gh_D11G1189,Gh_D12G2267,Gh_D10G1064,Gh_A03G1451,Gh_D01G1810,Gh_A10G1265,Gh_D03G1740,Gh_A05G2450,Gh_A01G0139,Gh_D11G2828,Gh_A10G2109,Gh_D02G2192,Gh_A11G3268,Gh_D13G0060,Gh_D11G0678,Gh_A09G0104,Gh_A02G0384,Gh_…	8.55728e-05
Biological process	post-embryonic root morphogenesis	GO:0010101	6	6.41271e-06	4.47152	13	89	1477	45215	Gh_D04G1252,Gh_A04G0767,Gh_D01G2215,Gh_Sca006585G01,Gh_D08G1288,Gh_A11G1077,Gh_A02G0341,Gh_A08G0662,Gh_A01G1955,Gh_D08G0763,Gh_D07G2125,Gh_D01G1776,Gh_D02G2389,	9.17934e-05
Biological process	lateral root morphogenesis	GO:0010102	7	6.41271e-06	4.47152	13	89	1477	45215	Gh_D04G1252,Gh_A04G0767,Gh_D01G2215,Gh_Sca006585G01,Gh_D08G1288,Gh_A11G1077,Gh_A02G0341,Gh_A08G0662,Gh_A01G1955,Gh_D08G0763,Gh_D07G2125,Gh_D01G1776,Gh_D02G2389,	9.17934e-05
Biological process	xanthophyll biosynthetic process	GO:0016123	11	7.2665e-06	11.4798	6	16	1477	45215	Gh_A11G2056,Gh_D13G1644,Gh_A05G0229,Gh_D05G0313,Gh_A13G1336,Gh_A11G1774,	0.000102071
Biological process	carotene metabolic process	GO:0016119	8	1.08247e-05	7.20299	8	34	1477	45215	Gh_A11G2056,Gh_A05G0229,Gh_D05G0313,Gh_A11G2306,Gh_D10G1327,Gh_A10G1167,Gh_A13G1497,Gh_D08G0586,	0.000150643
Biological process	photosynthesis, light harvesting in photosystem I	GO:0009768	6	1.09187e-05	10.8045	6	17	1477	45215	Gh_A01G1349,Gh_D07G1090,Gh_D01G1028,Gh_D01G1508,Gh_D05G0860,Gh_D12G1495,	0.000150558
Biological process	cellular nitrogen compound biosynthetic process	GO:0044271	5	1.19512e-05	1.28714	254	6041	1477	45215	Gh_A04G0790,Gh_A04G0306,Gh_A08G0463,Gh_A13G1680,Gh_A09G2025,Gh_A10G2216,Gh_A10G1363,Gh_D04G1284,Gh_D09G2054,Gh_A11G2056,Gh_D07G2410,Gh_A08G1770,Gh_A05G2354,Gh_D02G0780,Gh_D13G0358,Gh_A08G0863,Gh_D13G1698,Gh_A05G3249,Gh_D10G1805,Gh_A01G0439,Gh_Sca004857G04,Gh_A10G2274,Gh_D12G0943,Gh_D06G2150,Gh_D13G0330,Gh_A10G2292,Gh_D01G2216,Gh_D08G2692,Gh_A08G0848,Gh_A03G0937,Gh_D08G2696,Gh_D13G0351,Gh_A10G1822…	0.000163296
Biological process	regulation of photosynthesis	GO:0010109	6	1.36306e-05	6.9972	8	35	1477	45215	Gh_A01G1717,Gh_D05G1179,Gh_D13G1343,Gh_D01G1967,Gh_A05G3863,Gh_A13G1078,Gh_D12G2443,Gh_A11G1738,	0.000184566
Biological process	chloroplast-nucleus signaling pathway	GO:0010019	6	1.44793e-05	13.9149	5	11	1477	45215	Gh_D09G1997,Gh_A10G1223,Gh_A06G1917,Gh_A09G2286,Gh_D10G1271,	0.000194308
Biological process	terpene biosynthetic process	GO:0046246	8	1.49148e-05	8.24189	7	26	1477	45215	Gh_A11G2056,Gh_A05G0229,Gh_D05G0313,Gh_A11G2306,Gh_D10G1327,Gh_A10G1167,Gh_A13G1497,	0.00019838
Biological process	lipid biosynthetic process	GO:0008610	5	1.51747e-05	1.8967	50	807	1477	45215	Gh_A13G1665,Gh_A11G2056,Gh_D05G1933,Gh_A09G1555,Gh_D13G1644,Gh_D03G0111,Gh_A10G2292,Gh_D01G2211,Gh_D08G1373,Gh_A01G1717,Gh_A11G2878,Gh_D05G1179,Gh_A05G0229,Gh_A10G2109,Gh_D07G0746,Gh_D05G0313,Gh_A07G0274,Gh_A11G2306,Gh_D01G1967,Gh_D11G3263,Gh_D10G1327,Gh_A07G0668,Gh_A05G3863,Gh_D01G0627,Gh_A13G1336,Gh_A05G0324,Gh_D01G1197,Gh_D11G1883,Gh_D01G0235,Gh_A09G0044,Gh_A10G1167,Gh_D13G0573,Gh_D05G0429,Gh_…	0.000200067
Biological process	cellular biosynthetic process	GO:0044249	4	1.74276e-05	1.23321	329	8167	1477	45215	Gh_A04G0790,Gh_A04G0306,Gh_A08G0463,Gh_A13G1680,Gh_A09G2025,Gh_A10G2216,Gh_A10G1363,Gh_A05G1455,Gh_D03G0508,Gh_D04G1284,Gh_D09G2054,Gh_A11G2056,Gh_D07G2410,Gh_A08G1770,Gh_A05G2354,Gh_D02G0780,Gh_D13G0358,Gh_A08G0863,Gh_D05G1933,Gh_D13G1698,Gh_A05G3249,Gh_D10G1805,Gh_A01G0439,Gh_A09G1555,Gh_Sca004857G04,Gh_A10G2274,Gh_D12G0943,Gh_D13G1644,Gh_D06G2150,Gh_D13G0330,Gh_A10G2292,Gh_D07G1964,Gh_D01G2211…	0.000227771
Biological process	protein folding	GO:0006457	3	2.42538e-05	2.11934	36	520	1477	45215	Gh_A08G0009,Gh_D13G2122,Gh_A03G0935,Gh_D02G1101,Gh_D06G0006,Gh_D08G1876,Gh_D03G1033,Gh_A05G2863,Gh_A13G1772,Gh_A01G1813,Gh_A07G1163,Gh_A07G2012,Gh_A10G1292,Gh_D01G0676,Gh_D05G1261,Gh_A13G1397,Gh_A11G3232,Gh_A03G0499,Gh_D01G2051,Gh_A08G1569,Gh_A01G0656,Gh_A02G0073,Gh_D11G2333,Gh_D02G1319,Gh_A11G3119,Gh_A05G2646,Gh_A06G2084,Gh_D13G2425,Gh_D11G2217,Gh_A13G2092,Gh_A01G0823,Gh_D10G1996,Gh_A13G2023,Gh_…	0.000314254
Biological process	reproductive system development	GO:0061458	5	2.47338e-05	1.50602	104	2114	1477	45215	Gh_A04G0790,Gh_A10G1363,Gh_A02G1114,Gh_D05G0606,Gh_A08G0877,Gh_D03G0111,Gh_D13G0330,Gh_D02G0724,Gh_D07G1964,Gh_D13G0334,Gh_A03G0935,Gh_D11G2004,Gh_D03G1080,Gh_D05G0689,Gh_A05G1914,Gh_A02G0677,Gh_A13G1298,Gh_A11G2498,Gh_D05G2004,Gh_A08G2259,Gh_D02G1153,Gh_A07G0989,Gh_D13G0095,Gh_A05G2450,Gh_A01G0139,Gh_A03G0840,Gh_A10G2109,Gh_D08G1288,Gh_A11G1077,Gh_D11G2843,Gh_A06G0923,Gh_D11G1508,Gh_A08G2509,Gh_…	0.000317734
Biological process	reproductive structure development	GO:0048608	4	2.47338e-05	1.50602	104	2114	1477	45215	Gh_A04G0790,Gh_A10G1363,Gh_A02G1114,Gh_D05G0606,Gh_A08G0877,Gh_D03G0111,Gh_D13G0330,Gh_D02G0724,Gh_D07G1964,Gh_D13G0334,Gh_A03G0935,Gh_D11G2004,Gh_D03G1080,Gh_D05G0689,Gh_A05G1914,Gh_A02G0677,Gh_A13G1298,Gh_A11G2498,Gh_D05G2004,Gh_A08G2259,Gh_D02G1153,Gh_A07G0989,Gh_D13G0095,Gh_A05G2450,Gh_A01G0139,Gh_A03G0840,Gh_A10G2109,Gh_D08G1288,Gh_A11G1077,Gh_D11G2843,Gh_A06G0923,Gh_D11G1508,Gh_A08G2509,Gh_…	0.000317734
Biological process	lateral root development	GO:0048527	7	2.64188e-05	3.50527	15	131	1477	45215	Gh_D04G1252,Gh_A04G0767,Gh_D01G2215,Gh_D02G1153,Gh_Sca006585G01,Gh_A03G0840,Gh_D08G1288,Gh_A11G1077,Gh_A02G0341,Gh_A08G0662,Gh_A01G1955,Gh_D08G0763,Gh_D07G2125,Gh_D01G1776,Gh_D02G2389,	0.000333676
Biological process	isoprenoid metabolic process	GO:0006720	6	3.04188e-05	2.35483	28	364	1477	45215	Gh_A11G2056,Gh_A09G1555,Gh_D13G1644,Gh_A10G2292,Gh_A11G2878,Gh_A05G0229,Gh_D03G1358,Gh_D07G0746,Gh_D05G0313,Gh_A11G2306,Gh_D11G3263,Gh_D10G1327,Gh_A07G0668,Gh_A13G1336,Gh_D01G1197,Gh_D11G1883,Gh_A09G0044,Gh_A10G1167,Gh_D13G0573,Gh_D10G1640,Gh_A11G1774,Gh_A13G1497,Gh_D09G0042,Gh_D08G0586,Gh_A12G1799,Gh_A11G1725,Gh_D12G1968,Gh_D09G1627,	0.000380996
Biological process	small molecule metabolic process	GO:0044281	3	3.97301e-05	1.43244	124	2650	1477	45215	Gh_A04G0790,Gh_A09G2025,Gh_A13G1665,Gh_D12G0578,Gh_A06G0802,Gh_A11G2056,Gh_A12G0562,Gh_A08G0863,Gh_A09G1555,Gh_A10G2292,Gh_D01G2211,Gh_D08G1373,Gh_A10G2254,Gh_D13G0351,Gh_A05G1914,Gh_D09G0671,Gh_D12G2271,Gh_D07G2359,Gh_D09G2011,Gh_A05G1529,Gh_D10G1484,Gh_A11G0264,Gh_D05G1179,Gh_D01G1810,Gh_D03G1747,Gh_A13G1301,Gh_Sca035444G01,Gh_D03G1766,Gh_D06G0920,Gh_D03G1358,Gh_D09G0630,Gh_A03G2187,Gh_A13G1719…	0.000493507
Biological process	isopentenyl diphosphate biosynthetic process, methylerythritol 4-phosphate pathway	GO:0019288	9	4.11724e-05	7.14297	7	30	1477	45215	Gh_A11G2056,Gh_A09G1555,Gh_A10G2292,Gh_D10G1640,Gh_A12G1799,Gh_D12G1968,Gh_D09G1627,	0.00050723
Biological process	post-embryonic development	GO:0009791	3	4.26456e-05	1.42543	126	2706	1477	45215	Gh_A04G0790,Gh_D04G1252,Gh_A10G1363,Gh_A10G1359,Gh_A04G0767,Gh_A02G1114,Gh_D05G0606,Gh_A08G0877,Gh_D03G0111,Gh_D13G0330,Gh_D02G0724,Gh_D07G1964,Gh_D01G2215,Gh_D13G0334,Gh_A03G0935,Gh_D11G2004,Gh_D03G1080,Gh_D05G0689,Gh_A05G1914,Gh_A02G0677,Gh_A13G1298,Gh_A11G2498,Gh_D09G2008,Gh_D05G2004,Gh_A08G2259,Gh_D02G1153,Gh_A07G0989,Gh_Sca006585G01,Gh_D03G0895,Gh_D13G0095,Gh_A05G2450,Gh_A01G0139,Gh_A03G0840…	0.000521108
Biological process	positive regulation of flower development	GO:0009911	8	4.35076e-05	3.75439	13	106	1477	45215	Gh_D05G0606,Gh_D13G0330,Gh_A10G2109,Gh_A06G0923,Gh_A03G2173,Gh_A02G0384,Gh_A12G0259,Gh_A13G0549,Gh_D13G0583,Gh_D12G0259,Gh_A05G0488,Gh_D11G0416,Gh_A11G0358,	0.000527354
Biological process	organelle organization	GO:0006996	4	4.81768e-05	1.61005	74	1407	1477	45215	Gh_A11G2068,Gh_D13G0392,Gh_A10G1822,Gh_D06G0066,Gh_A05G1914,Gh_A01G1807,Gh_A01G0953,Gh_D12G2267,Gh_A03G1451,Gh_A10G1265,Gh_A05G2450,Gh_A01G0139,Gh_D11G2828,Gh_D02G2192,Gh_A11G3268,Gh_A09G0104,Gh_A02G0384,Gh_D03G1379,Gh_A12G1563,Gh_D01G0183,Gh_D01G1001,Gh_D11G0187,Gh_D11G2374,Gh_D10G1779,Gh_D09G0100,Gh_A07G0274,Gh_D09G1423,Gh_D01G0682,Gh_A10G1304,Gh_A08G1298,Gh_A06G0093,Gh_D05G2149,Gh_A11G0177,Gh_…	0.000579278
Biological process	NADP metabolic process	GO:0006739	11	5.01353e-05	5.19839	9	53	1477	45215	Gh_D12G0578,Gh_A12G0562,Gh_D13G1343,Gh_A13G1078,Gh_D13G0294,Gh_D13G0295,Gh_D06G1273,Gh_A13G0275,Gh_A13G0276,	0.000598042
Biological process	regulation of photosynthesis, light reaction	GO:0042548	7	5.16843e-05	6.91255	7	31	1477	45215	Gh_A01G1717,Gh_D05G1179,Gh_D13G1343,Gh_D01G1967,Gh_A05G3863,Gh_A13G1078,Gh_A11G1738,	0.000611666
Biological process	xanthophyll metabolic process	GO:0016122	10	5.16843e-05	6.91255	7	31	1477	45215	Gh_A11G2056,Gh_D13G1644,Gh_A05G0229,Gh_D05G0313,Gh_A13G1336,Gh_A11G1774,Gh_D08G0586,	0.000611666
Biological process	syncytium formation	GO:0006949	4	5.58091e-05	5.831	8	42	1477	45215	Gh_A05G2385,Gh_D13G0060,Gh_D04G1924,Gh_A13G0050,Gh_A12G1619,Gh_D05G2650,Gh_A07G0902,Gh_D07G0974,	0.00065024
Biological process	terpene metabolic process	GO:0042214	7	6.66107e-05	5.69539	8	43	1477	45215	Gh_A11G2056,Gh_A05G0229,Gh_D05G0313,Gh_A11G2306,Gh_D10G1327,Gh_A10G1167,Gh_A13G1497,Gh_D08G0586,	0.000770123
Biological process	neurotransmitter metabolic process	GO:0042133	5	6.96512e-05	4.50187	10	68	1477	45215	Gh_A06G0802,Gh_A11G0264,Gh_D06G0920,Gh_A03G0026,Gh_A11G1879,Gh_A05G0330,Gh_D03G1625,Gh_D05G0435,Gh_A12G1799,Gh_D12G1968,	0.000799128
Biological process	regulation of neurotransmitter levels	GO:0001505	4	6.96512e-05	4.50187	10	68	1477	45215	Gh_A06G0802,Gh_A11G0264,Gh_D06G0920,Gh_A03G0026,Gh_A11G1879,Gh_A05G0330,Gh_D03G1625,Gh_D05G0435,Gh_A12G1799,Gh_D12G1968,	0.000799128
Biological process	starch metabolic process	GO:0005982	8	7.28064e-05	4.10659	11	82	1477	45215	Gh_A05G1455,Gh_D07G1964,Gh_A12G2374,Gh_D12G2659,Gh_D11G1508,Gh_A10G0362,Gh_D05G1629,Gh_A10G2060,Gh_A11G1361,Gh_D10G2468,Gh_A07G1759,	0.000816627
Biological process	glycine metabolic process	GO:0006544	10	7.90932e-05	5.56595	8	44	1477	45215	Gh_A06G0802,Gh_A11G0264,Gh_D06G0920,Gh_A03G0026,Gh_A11G1879,Gh_A05G0330,Gh_D03G1625,Gh_D05G0435,	0.000880571
Biological process	coenzyme metabolic process	GO:0006732	5	9.30254e-05	2.14075	30	429	1477	45215	Gh_D12G0578,Gh_A12G0562,Gh_A08G0863,Gh_D07G2359,Gh_A05G1529,Gh_D10G1484,Gh_D03G1747,Gh_A13G1301,Gh_D09G0630,Gh_A13G0851,Gh_D13G1343,Gh_D05G1700,Gh_A07G2148,Gh_D10G0782,Gh_A13G1096,Gh_A13G1078,Gh_A05G3552,Gh_A10G1039,Gh_D13G0294,Gh_D13G0295,Gh_A01G0775,Gh_A09G1230,Gh_D13G1603,Gh_A10G0618,Gh_D06G1273,Gh_D01G0800,Gh_A13G0275,Gh_A13G0276,Gh_D10G2037,Gh_D09G1232,	0.00102807
Biological process	oxoacid metabolic process	GO:0043436	5	9.59021e-05	1.49772	91	1860	1477	45215	Gh_A09G2025,Gh_A13G1665,Gh_A06G0802,Gh_A11G2056,Gh_A08G0863,Gh_A09G1555,Gh_A10G2292,Gh_D01G2211,Gh_D08G1373,Gh_A10G2254,Gh_A05G1914,Gh_D09G0671,Gh_D12G2271,Gh_D07G2359,Gh_D09G2011,Gh_A05G1529,Gh_A11G0264,Gh_D05G1179,Gh_D01G1810,Gh_D06G0920,Gh_D03G1358,Gh_D09G0630,Gh_A03G2187,Gh_A13G0851,Gh_D02G1726,Gh_D09G1909,Gh_D01G2339,Gh_A02G1244,Gh_A03G0026,Gh_D09G0572,Gh_A11G1879,Gh_A06G1328,Gh_D10G1375,Gh_…	0.00105212
Biological process	regulation of generation of precursor metabolites and energy	GO:0043467	6	9.70668e-05	6.30262	7	34	1477	45215	Gh_A01G1717,Gh_D05G1179,Gh_D13G1343,Gh_D01G1967,Gh_A05G3863,Gh_A13G1078,Gh_A11G1738,	0.00105718
Biological process	organic acid metabolic process	GO:0006082	4	9.95295e-05	1.49611	91	1862	1477	45215	Gh_A09G2025,Gh_A13G1665,Gh_A06G0802,Gh_A11G2056,Gh_A08G0863,Gh_A09G1555,Gh_A10G2292,Gh_D01G2211,Gh_D08G1373,Gh_A10G2254,Gh_A05G1914,Gh_D09G0671,Gh_D12G2271,Gh_D07G2359,Gh_D09G2011,Gh_A05G1529,Gh_A11G0264,Gh_D05G1179,Gh_D01G1810,Gh_D06G0920,Gh_D03G1358,Gh_D09G0630,Gh_A03G2187,Gh_A13G0851,Gh_D02G1726,Gh_D09G1909,Gh_D01G2339,Gh_A02G1244,Gh_A03G0026,Gh_D09G0572,Gh_A11G1879,Gh_A06G1328,Gh_D10G1375,Gh_…	0.00107621
Biological process	carboxylic acid metabolic process	GO:0019752	6	0.000112095	1.5064	87	1768	1477	45215	Gh_A09G2025,Gh_A13G1665,Gh_A06G0802,Gh_A11G2056,Gh_A08G0863,Gh_A09G1555,Gh_A10G2292,Gh_D08G1373,Gh_A10G2254,Gh_A05G1914,Gh_D09G0671,Gh_D12G2271,Gh_D07G2359,Gh_D09G2011,Gh_A05G1529,Gh_A11G0264,Gh_D05G1179,Gh_D01G1810,Gh_D06G0920,Gh_D03G1358,Gh_D09G0630,Gh_A03G2187,Gh_A13G0851,Gh_D02G1726,Gh_D09G1909,Gh_D01G2339,Gh_A03G0026,Gh_D09G0572,Gh_A11G1879,Gh_A06G1328,Gh_D10G1375,Gh_A05G3863,Gh_D01G0627,Gh_…	0.00120342
Biological process	post-embryonic root development	GO:0048528	6	0.000117265	3.08182	15	149	1477	45215	Gh_D04G1252,Gh_A04G0767,Gh_D01G2215,Gh_D02G1153,Gh_Sca006585G01,Gh_A03G0840,Gh_D08G1288,Gh_A11G1077,Gh_A02G0341,Gh_A08G0662,Gh_A01G1955,Gh_D08G0763,Gh_D07G2125,Gh_D01G1776,Gh_D02G2389,	0.00124999
Biological process	lateral root formation	GO:0010311	5	0.000136315	4.59191	9	60	1477	45215	Gh_D04G1252,Gh_A04G0767,Gh_D01G2215,Gh_D08G1288,Gh_A11G1077,Gh_A08G0662,Gh_A01G1955,Gh_D08G0763,Gh_D01G1776,	0.00141298
Biological process	cellular component biogenesis	GO:0044085	3	0.00015338	1.6166	63	1193	1477	45215	Gh_A10G1389,Gh_A04G0306,Gh_A11G2068,Gh_D13G1272,Gh_A02G1114,Gh_D10G1805,Gh_D11G1208,Gh_A10G1822,Gh_D05G2856,Gh_D05G2893,Gh_A03G1039,Gh_D04G0745,Gh_D11G1189,Gh_D05G3347,Gh_D10G1064,Gh_A03G1451,Gh_D03G1740,Gh_A05G2450,Gh_D11G2828,Gh_A11G3268,Gh_D11G0678,Gh_A08G0732,Gh_D11G2417,Gh_D11G2374,Gh_A03G0056,Gh_D08G0869,Gh_A05G0720,Gh_A05G1644,Gh_A05G2956,Gh_A11G0155,Gh_D05G3014,Gh_A05G2569,Gh_D13G0173,Gh_…	0.00157897
Biological process	de-etiolation	GO:0009704	6	0.000164615	9.00374	5	17	1477	45215	Gh_A03G0935,Gh_D03G0895,Gh_A08G1298,Gh_D08G1590,Gh_D02G1319,	0.00168311
Biological process	carbon utilization	GO:0015976	2	0.000164615	9.00374	5	17	1477	45215	Gh_A09G0259,Gh_D09G0259,Gh_A07G2024,Gh_D04G0517,Gh_D07G2244,	0.00168311
Biological process	very long-chain fatty acid metabolic process	GO:0000038	9	0.000174203	4.998	8	49	1477	45215	Gh_A13G1665,Gh_D08G1373,Gh_D01G1810,Gh_D02G1726,Gh_A01G1563,Gh_A03G1286,Gh_A07G1227,Gh_D13G2029,	0.00175723
Biological process	phototropism	GO:0009638	7	0.000174203	4.998	8	49	1477	45215	Gh_D07G0636,Gh_A02G0384,Gh_A05G0854,Gh_A05G0855,Gh_A03G2165,Gh_D11G2686,Gh_A08G1808,Gh_A03G0296,	0.00175723
Biological process	plant ovule development	GO:0048481	5	0.000180677	4.02799	10	76	1477	45215	Gh_A05G1914,Gh_D05G2149,Gh_A09G1755,Gh_D12G2443,Gh_Sca004851G02,Gh_D11G0416,Gh_A11G0358,Gh_A10G1936,Gh_D09G0774,Gh_A09G0774,	0.00179839
Biological process	developmental process involved in reproduction	GO:0003006	3	0.000189598	1.42198	106	2282	1477	45215	Gh_A04G0790,Gh_A10G1363,Gh_D13G2177,Gh_A02G1114,Gh_D05G0606,Gh_A08G0877,Gh_D03G0111,Gh_D13G0330,Gh_D02G0724,Gh_D07G1964,Gh_D13G0334,Gh_A03G0935,Gh_D11G2004,Gh_D03G1080,Gh_D05G0689,Gh_A05G1914,Gh_A02G0677,Gh_A13G1298,Gh_A11G2498,Gh_D05G2004,Gh_A08G2259,Gh_D02G1153,Gh_A07G0989,Gh_D13G0095,Gh_A05G2450,Gh_A01G0139,Gh_A03G0840,Gh_A10G2109,Gh_D08G1288,Gh_A11G1077,Gh_D11G2843,Gh_A06G0923,Gh_D11G1508,Gh_…	0.00187477
Biological process	reactive oxygen species metabolic process	GO:0072593	4	0.000201628	3.97568	10	77	1477	45215	Gh_A11G2096,Gh_D03G0021,Gh_D11G2412,Gh_A02G1698,Gh_A08G0643,Gh_D08G0737,Gh_A02G1059,Gh_A12G1799,Gh_D09G0858,Gh_D12G1968,	0.0019807
Biological process	cytochrome complex assembly	GO:0017004	7	0.000244247	6.55987	6	28	1477	45215	Gh_A03G1039,Gh_D11G0678,Gh_D09G0405,Gh_A11G0023,Gh_D11G0021,Gh_D02G1432,	0.00236841
Biological process	positive regulation of reproductive process	GO:2000243	5	0.000256263	3.15846	13	126	1477	45215	Gh_D05G0606,Gh_D13G0330,Gh_A10G2109,Gh_A06G0923,Gh_A03G2173,Gh_A02G0384,Gh_A12G0259,Gh_A13G0549,Gh_D13G0583,Gh_D12G0259,Gh_A05G0488,Gh_D11G0416,Gh_A11G0358,	0.00246899
Biological process	plastid fission	GO:0043572	6	0.000283607	5.35723	7	40	1477	45215	Gh_D12G2267,Gh_D02G2192,Gh_D01G0682,Gh_A01G0662,Gh_D01G2010,Gh_D02G1983,Gh_D01G1772,	0.00271504
Biological process	floral whorl development	GO:0048438	4	0.00028808	2.20632	24	333	1477	45215	Gh_D03G0111,Gh_D05G0689,Gh_A05G1914,Gh_A02G0677,Gh_D08G1288,Gh_A11G1077,Gh_A04G1079,Gh_D05G2149,Gh_D03G0303,Gh_A08G0662,Gh_D12G0758,Gh_D08G0763,Gh_A09G1755,Gh_D05G0024,Gh_D12G2443,Gh_Sca004851G02,Gh_D11G1818,Gh_D11G0416,Gh_A04G0038,Gh_A11G0358,Gh_A10G1936,Gh_A11G1658,Gh_D09G0774,Gh_A09G0774,	0.0027404
Biological process	chloroplast fission	GO:0010020	7	0.000299491	6.33367	6	29	1477	45215	Gh_D12G2267,Gh_D02G2192,Gh_D01G0682,Gh_A01G0662,Gh_D01G2010,Gh_D02G1983,	0.00283103
Biological process	positive regulation of post-embryonic development	GO:0048582	7	0.000348368	3.06127	13	130	1477	45215	Gh_D05G0606,Gh_D13G0330,Gh_A10G2109,Gh_A06G0923,Gh_A03G2173,Gh_A02G0384,Gh_A12G0259,Gh_A13G0549,Gh_D13G0583,Gh_D12G0259,Gh_A05G0488,Gh_D11G0416,Gh_A11G0358,	0.00323208
Biological process	protein-containing complex assembly	GO:0065003	5	0.000363424	2.00399	29	443	1477	45215	Gh_A10G1389,Gh_A11G2068,Gh_D13G1272,Gh_D11G1208,Gh_A03G1039,Gh_D11G1189,Gh_D10G1064,Gh_A03G1451,Gh_D03G1740,Gh_D11G0678,Gh_D11G2374,Gh_D13G0173,Gh_D13G1436,Gh_D04G0945,Gh_D09G0405,Gh_A07G0334,Gh_A13G1021,Gh_A11G0023,Gh_A13G0152,Gh_D04G1433,Gh_A13G1470,Gh_A04G0918,Gh_A04G0428,Gh_D05G3193,Gh_A02G1095,Gh_A11G1738,Gh_D11G0021,Gh_D02G1911,Gh_D02G1432,	0.00335108
Biological process	seed development	GO:0048316	5	0.000369553	1.58342	60	1160	1477	45215	Gh_A04G0790,Gh_A10G1363,Gh_A02G1114,Gh_D05G0606,Gh_A08G0877,Gh_D02G0724,Gh_D13G0334,Gh_A03G0935,Gh_D11G2004,Gh_D03G1080,Gh_A13G1298,Gh_A11G2498,Gh_D05G2004,Gh_A08G2259,Gh_A07G0989,Gh_D13G0095,Gh_A05G2450,Gh_D11G2843,Gh_A06G0923,Gh_A08G2509,Gh_A03G2187,Gh_D03G0046,Gh_A10G2183,Gh_A11G0100,Gh_D11G0176,Gh_D05G2503,Gh_A06G1328,Gh_A13G0079,Gh_A05G1644,Gh_A13G1397,Gh_D13G0920,Gh_A11G3232,Gh_A03G0459,Gh_…	0.00338682
Biological process	regulation of flower development	GO:0009909	7	0.000397994	2.29595	21	280	1477	45215	Gh_A10G1363,Gh_D05G0606,Gh_D13G0330,Gh_D02G1153,Gh_A01G0139,Gh_A03G0840,Gh_A10G2109,Gh_A06G0923,Gh_A03G2173,Gh_A02G0384,Gh_D01G0183,Gh_A12G0259,Gh_A13G0549,Gh_D13G0583,Gh_D12G0259,Gh_A05G0488,Gh_D11G0416,Gh_D04G1379,Gh_A04G0879,Gh_A11G0358,Gh_D10G1107,	0.00362536
Biological process	plant-type ovary development	GO:0035670	5	0.000413201	3.64437	10	84	1477	45215	Gh_A05G1914,Gh_D05G2149,Gh_A09G1755,Gh_D12G2443,Gh_Sca004851G02,Gh_D11G0416,Gh_A11G0358,Gh_A10G1936,Gh_D09G0774,Gh_A09G0774,	0.00374121
Biological process	pentose-phosphate shunt	GO:0006098	12	0.000450187	4.98347	7	43	1477	45215	Gh_D12G0578,Gh_A12G0562,Gh_D13G0294,Gh_D13G0295,Gh_D06G1273,Gh_A13G0275,Gh_A13G0276,	0.00405168
Biological process	glucose 6-phosphate metabolic process	GO:0051156	6	0.000450187	4.98347	7	43	1477	45215	Gh_D12G0578,Gh_A12G0562,Gh_D13G0294,Gh_D13G0295,Gh_D06G1273,Gh_A13G0275,Gh_A13G0276,	0.00405168
Biological process	cellular protein-containing complex assembly	GO:0034622	6	0.000484999	2.05667	26	387	1477	45215	Gh_A10G1389,Gh_A11G2068,Gh_D13G1272,Gh_D11G1208,Gh_A03G1039,Gh_D10G1064,Gh_D03G1740,Gh_D11G0678,Gh_D11G2374,Gh_D13G0173,Gh_D13G1436,Gh_D04G0945,Gh_D09G0405,Gh_A07G0334,Gh_A13G1021,Gh_A11G0023,Gh_A13G0152,Gh_D04G1433,Gh_A13G1470,Gh_A04G0918,Gh_A04G0428,Gh_D05G3193,Gh_A02G1095,Gh_A11G1738,Gh_D11G0021,Gh_D02G1432,	0.00428796
Biological process	cellular lipid metabolic process	GO:0044255	5	0.000495027	1.60048	55	1052	1477	45215	Gh_A13G1665,Gh_A11G2056,Gh_A09G1555,Gh_D13G1644,Gh_A10G2292,Gh_D01G2211,Gh_D08G1373,Gh_A10G2254,Gh_A01G1717,Gh_D12G2271,Gh_A11G2878,Gh_D05G1179,Gh_A05G0229,Gh_D01G1810,Gh_D03G1358,Gh_D03G0048,Gh_D02G1726,Gh_D07G0746,Gh_D05G0313,Gh_A07G0274,Gh_A11G2306,Gh_D01G1967,Gh_D09G0572,Gh_D11G3263,Gh_D10G1327,Gh_A07G0668,Gh_A05G3863,Gh_D01G0627,Gh_A13G1336,Gh_A05G0324,Gh_D01G1197,Gh_D11G1883,Gh_A01G1563,Gh_…	0.00435103
Biological process	anatomical structure formation involved in morphogenesis	GO:0048646	3	0.000512848	2.15979	23	326	1477	45215	Gh_D04G1252,Gh_A05G2385,Gh_A04G0767,Gh_D01G2215,Gh_D05G0689,Gh_A02G0677,Gh_A04G0705,Gh_D08G1288,Gh_A11G1077,Gh_D04G1173,Gh_D13G0060,Gh_D04G1924,Gh_A13G0050,Gh_A12G1619,Gh_A08G0662,Gh_A01G1955,Gh_D08G0763,Gh_D05G2650,Gh_A07G0902,Gh_A04G0038,Gh_D07G0974,Gh_A03G0263,Gh_D01G1776,	0.00448146
Biological process	isopentenyl diphosphate biosynthetic process	GO:0009240	8	0.000520394	4.87021	7	44	1477	45215	Gh_A11G2056,Gh_A09G1555,Gh_A10G2292,Gh_D10G1640,Gh_A12G1799,Gh_D12G1968,Gh_D09G1627,	0.00452111
Biological process	isopentenyl diphosphate metabolic process	GO:0046490	7	0.000520394	4.87021	7	44	1477	45215	Gh_A11G2056,Gh_A09G1555,Gh_A10G2292,Gh_D10G1640,Gh_A12G1799,Gh_D12G1968,Gh_D09G1627,	0.00452111
Biological process	cellular response to phosphate starvation	GO:0016036	8	0.000548333	3.5187	10	87	1477	45215	Gh_D01G2211,Gh_D08G1288,Gh_A11G1077,Gh_D03G0021,Gh_A02G1698,Gh_A05G0324,Gh_A08G0662,Gh_D05G0429,Gh_D08G0763,Gh_A05G0092,	0.0047094
Biological process	protein-containing complex subunit organization	GO:0043933	4	0.000562368	1.92533	30	477	1477	45215	Gh_A10G1389,Gh_A11G2068,Gh_D13G1272,Gh_D11G1208,Gh_A03G1039,Gh_D11G1189,Gh_D10G1064,Gh_A03G1451,Gh_D03G1740,Gh_D11G0678,Gh_D11G2374,Gh_D13G0173,Gh_D13G1436,Gh_D04G0945,Gh_D09G0405,Gh_A07G0334,Gh_A13G1021,Gh_A11G0023,Gh_A13G0152,Gh_D04G1433,Gh_A13G1470,Gh_A04G0918,Gh_A04G0428,Gh_D05G3193,Gh_A02G1095,Gh_A11G1738,Gh_D11G0021,Gh_D02G1911,Gh_D02G1432,Gh_A03G2013,	0.00480249
Biological process	positive regulation of multicellular organismal process	GO:0051240	5	0.000618832	2.88381	13	138	1477	45215	Gh_D05G0606,Gh_D13G0330,Gh_A10G2109,Gh_A06G0923,Gh_A03G2173,Gh_A02G0384,Gh_A12G0259,Gh_A13G0549,Gh_D13G0583,Gh_D12G0259,Gh_A05G0488,Gh_D11G0416,Gh_A11G0358,	0.00525483
Biological process	plant-type cell wall modification involved in multidimensional cell growth	GO:0009831	8	0.000642377	4.15088	8	59	1477	45215	Gh_A05G2385,Gh_D13G0060,Gh_D04G1924,Gh_A13G0050,Gh_A12G1619,Gh_D05G2650,Gh_A07G0902,Gh_D07G0974,	0.00539382
Biological process	ribosome biogenesis	GO:0042254	5	0.000760974	1.99481	26	399	1477	45215	Gh_A04G0306,Gh_D10G1805,Gh_A10G1822,Gh_D05G2856,Gh_D05G2893,Gh_D04G0745,Gh_D05G3347,Gh_D11G2828,Gh_A11G3268,Gh_A08G0732,Gh_A03G0056,Gh_D08G0869,Gh_A05G0720,Gh_A05G1644,Gh_A05G2956,Gh_A11G0155,Gh_A05G2569,Gh_D03G1600,Gh_A11G1844,Gh_D11G0169,Gh_A12G2150,Gh_D08G0709,Gh_D05G1833,Gh_D11G2171,Gh_A10G1554,Gh_D12G2326,	0.006216
Biological process	embryo development ending in seed dormancy	GO:0009793	6	0.000794628	1.5829	53	1025	1477	45215	Gh_A04G0790,Gh_A02G1114,Gh_D05G0606,Gh_A08G0877,Gh_D13G0334,Gh_A03G0935,Gh_D03G1080,Gh_A13G1298,Gh_A11G2498,Gh_A08G2259,Gh_A07G0989,Gh_D13G0095,Gh_A05G2450,Gh_D11G2843,Gh_A06G0923,Gh_A08G2509,Gh_A03G2187,Gh_D03G0046,Gh_A10G2183,Gh_A11G0100,Gh_D11G0176,Gh_A06G1328,Gh_A13G0079,Gh_A05G1644,Gh_A13G1397,Gh_D13G0920,Gh_A11G3232,Gh_A03G0459,Gh_A12G1621,Gh_D11G0104,Gh_D11G2333,Gh_A06G0555,Gh_D02G1319,Gh_…	0.00645582
Biological process	regulation of shoot system development	GO:0048831	6	0.000853558	2.16454	21	297	1477	45215	Gh_A10G1363,Gh_D05G0606,Gh_D13G0330,Gh_D02G1153,Gh_A01G0139,Gh_A03G0840,Gh_A10G2109,Gh_A06G0923,Gh_A03G2173,Gh_A02G0384,Gh_D01G0183,Gh_A12G0259,Gh_A13G0549,Gh_D13G0583,Gh_D12G0259,Gh_A05G0488,Gh_D11G0416,Gh_D04G1379,Gh_A04G0879,Gh_A11G0358,Gh_D10G1107,	0.0068973
Biological process	phytosteroid biosynthetic process	GO:0016129	7	0.000865979	5.2479	6	35	1477	45215	Gh_D05G1933,Gh_D03G0111,Gh_A10G2109,Gh_A05G1738,Gh_D11G1818,Gh_A11G1658,	0.00696025
Biological process	brassinosteroid biosynthetic process	GO:0016132	8	0.000865979	5.2479	6	35	1477	45215	Gh_D05G1933,Gh_D03G0111,Gh_A10G2109,Gh_A05G1738,Gh_D11G1818,Gh_A11G1658,	0.00696025
Biological process	membrane organization	GO:0061024	4	0.00097527	2.62931	14	163	1477	45215	Gh_A11G2068,Gh_A10G1265,Gh_A05G2450,Gh_D11G2374,Gh_A07G0274,Gh_D03G1227,Gh_D10G1219,Gh_D11G0911,Gh_A03G0350,Gh_D04G1433,Gh_A04G0918,Gh_A12G1799,Gh_D12G1968,Gh_A11G0782,	0.00775572
Biological process	system development	GO:0048731	4	0.00101155	1.3186	125	2902	1477	45215	Gh_A04G0790,Gh_D04G1252,Gh_A10G1363,Gh_A04G0767,Gh_A02G1114,Gh_D05G0606,Gh_A08G0877,Gh_D03G0111,Gh_D13G0330,Gh_D02G0724,Gh_D07G1964,Gh_D01G2215,Gh_D13G0334,Gh_A03G0935,Gh_D11G2004,Gh_D03G1080,Gh_D05G0689,Gh_A05G1914,Gh_A02G0677,Gh_A13G1298,Gh_A04G0705,Gh_A11G2498,Gh_D05G2004,Gh_A08G2259,Gh_D02G1153,Gh_A07G0989,Gh_Sca006585G01,Gh_D13G0095,Gh_A05G2450,Gh_A01G0139,Gh_A03G0840,Gh_A10G2109,Gh_D08G1288…	0.0080019
Biological process	reproductive shoot system development	GO:0090567	6	0.00102022	1.6242	46	867	1477	45215	Gh_A10G1363,Gh_D05G0606,Gh_D03G0111,Gh_D13G0330,Gh_D05G0689,Gh_A05G1914,Gh_A02G0677,Gh_D02G1153,Gh_A01G0139,Gh_A03G0840,Gh_A10G2109,Gh_D08G1288,Gh_A11G1077,Gh_A06G0923,Gh_A03G2173,Gh_A02G0384,Gh_D01G0183,Gh_A12G0259,Gh_A04G1079,Gh_D05G2149,Gh_D03G0303,Gh_A08G0662,Gh_A13G0549,Gh_D12G0758,Gh_A09G0044,Gh_D13G0583,Gh_D08G0763,Gh_A09G1755,Gh_D05G0024,Gh_D09G0042,Gh_D12G2443,Gh_Sca004851G02,Gh_D11G1818…	0.00802822
Biological process	organelle localization	GO:0051640	4	0.00104403	3.03369	11	111	1477	45215	Gh_D06G0066,Gh_A01G0953,Gh_A04G0671,Gh_D04G1136,Gh_A12G1563,Gh_D01G1001,Gh_A06G0093,Gh_D12G1691,Gh_A05G0854,Gh_A05G0855,Gh_A03G0296,	0.0081728
Biological process	serine family amino acid metabolic process	GO:0009069	9	0.00109246	3.48753	9	79	1477	45215	Gh_A06G0802,Gh_A11G0264,Gh_D06G0920,Gh_A03G0026,Gh_A11G1879,Gh_A05G0330,Gh_D03G1625,Gh_D13G1029,Gh_D05G0435,	0.00808849
Biological process	epithelium development	GO:0060429	5	0.00114465	4.28578	7	50	1477	45215	Gh_D04G1252,Gh_A13G1665,Gh_A04G0767,Gh_D01G2215,Gh_A01G1955,Gh_D11G0934,Gh_D13G2029,	0.00843338
Biological process	lipid metabolic process	GO:0006629	4	0.00117108	1.44643	73	1545	1477	45215	Gh_A13G1665,Gh_A11G2056,Gh_D05G1933,Gh_D01G0005,Gh_A09G1555,Gh_D13G1644,Gh_D03G0111,Gh_A10G2292,Gh_D01G2211,Gh_D08G1373,Gh_D06G2129,Gh_A10G2254,Gh_A01G1717,Gh_D12G2271,Gh_A11G2878,Gh_D05G1179,Gh_D05G2034,Gh_A05G0229,Gh_D01G1810,Gh_A10G2109,Gh_D03G1358,Gh_D03G0048,Gh_D02G1726,Gh_D07G0746,Gh_D05G0313,Gh_A07G0274,Gh_A11G2306,Gh_D01G1967,Gh_D09G0572,Gh_D11G3263,Gh_A11G1410,Gh_D10G1327,Gh_Sca009545G02…	0.008586
Biological process	monocarboxylic acid metabolic process	GO:0032787	7	0.00122604	1.60935	46	875	1477	45215	Gh_A13G1665,Gh_A11G2056,Gh_A08G0863,Gh_A09G1555,Gh_A10G2292,Gh_D08G1373,Gh_A10G2254,Gh_D09G0671,Gh_D12G2271,Gh_D07G2359,Gh_D09G2011,Gh_A05G1529,Gh_D05G1179,Gh_D01G1810,Gh_D03G1358,Gh_D09G0630,Gh_D02G1726,Gh_D09G0572,Gh_A05G3863,Gh_D01G0627,Gh_A01G1563,Gh_A01G1505,Gh_D05G1700,Gh_A07G2148,Gh_A12G2100,Gh_D10G1640,Gh_D10G0782,Gh_A13G1096,Gh_A03G1286,Gh_A07G1227,Gh_A11G1774,Gh_D02G0080,Gh_D02G0081,Gh_…	0.00894534
Biological process	ribonucleoprotein complex biogenesis	GO:0022613	4	0.00129096	1.92254	26	414	1477	45215	Gh_A04G0306,Gh_D10G1805,Gh_A10G1822,Gh_D05G2856,Gh_D05G2893,Gh_D04G0745,Gh_D05G3347,Gh_D11G2828,Gh_A11G3268,Gh_A08G0732,Gh_A03G0056,Gh_D08G0869,Gh_A05G0720,Gh_A05G1644,Gh_A05G2956,Gh_A11G0155,Gh_A05G2569,Gh_D03G1600,Gh_A11G1844,Gh_D11G0169,Gh_A12G2150,Gh_D08G0709,Gh_D05G1833,Gh_D11G2171,Gh_A10G1554,Gh_D12G2326,	0.00937353
Biological process	fruit development	GO:0010154	5	0.00134818	1.50062	60	1224	1477	45215	Gh_A04G0790,Gh_A10G1363,Gh_A02G1114,Gh_D05G0606,Gh_A08G0877,Gh_D02G0724,Gh_D13G0334,Gh_A03G0935,Gh_D11G2004,Gh_D03G1080,Gh_A13G1298,Gh_A11G2498,Gh_D05G2004,Gh_A08G2259,Gh_A07G0989,Gh_D13G0095,Gh_A05G2450,Gh_D11G2843,Gh_A06G0923,Gh_A08G2509,Gh_A03G2187,Gh_D03G0046,Gh_A10G2183,Gh_A11G0100,Gh_D11G0176,Gh_D05G2503,Gh_A06G1328,Gh_A13G0079,Gh_A05G1644,Gh_A13G1397,Gh_D13G0920,Gh_A11G3232,Gh_A03G0459,Gh_…	0.00974192
Biological process	cell wall modification involved in multidimensional cell growth	GO:0042547	7	0.00136139	3.71063	8	66	1477	45215	Gh_A05G2385,Gh_D13G0060,Gh_D04G1924,Gh_A13G0050,Gh_A12G1619,Gh_D05G2650,Gh_A07G0902,Gh_D07G0974,	0.0097903
Biological process	DNA-templated transcription, initiation	GO:0006352	9	0.00139547	2.92817	11	115	1477	45215	Gh_D08G2692,Gh_D12G2691,Gh_A04G0611,Gh_A09G1388,Gh_D04G1071,Gh_D11G2299,Gh_D09G1393,Gh_D08G2338,Gh_D11G3048,Gh_A08G2319,Gh_A08G2347,	0.00998761
